# Supplementary material for: Comprehensive Analysis of GASA Family Members in the Peanut Genome: Identification, Characterization, and Their Expressions in Response to Pod Development
Source: MDPI journal article supplement (doi:10.3390/agronomy12123067), 2022-12-03
Supplement: s1 [file s1]

Archive with 2 entries (2 files):
- agronomy-2012308-Supplementary Figure.pdf
- agronomy-2012308-Supplementary Tables.xlsx
