# Supplementary material for: Comprehensive Analysis of GASA Family Members in the Peanut Genome: Identification, Characterization, and Their Expressions in Response to Pod Development
Source: MDPI journal article supplement (doi:10.3390/agronomy12123067), 2022-12-03
Supplement: s1 [file s1 › agronomy-2012308-Supplementary Figure.pdf]

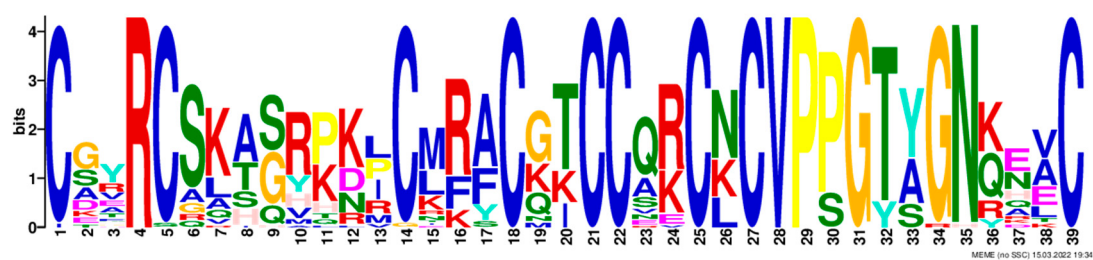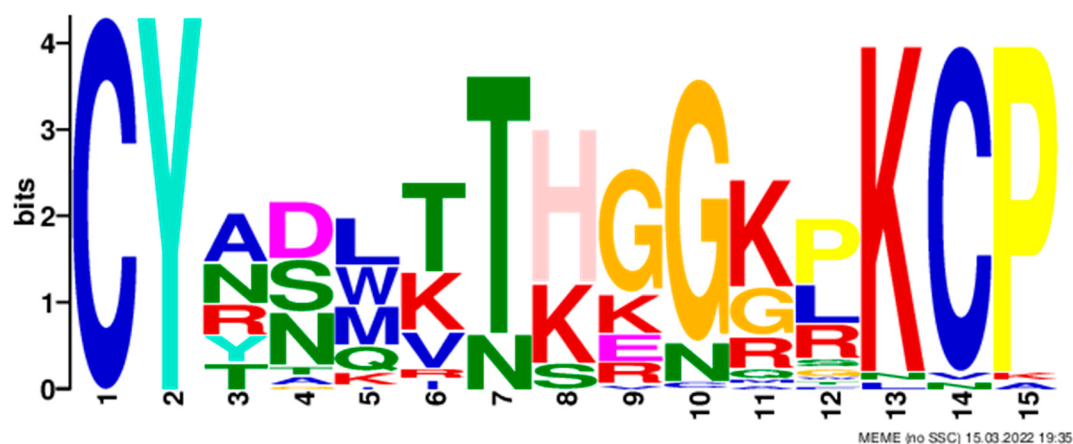

**Figure S1.** Sequence logo analysis of the conserved AhGASA domains. Each stack represents their amino acids.
