# Supplementary material for: Comprehensive Analysis of GASA Family Members in the Peanut Genome: Identification, Characterization, and Their Expressions in Response to Pod Development
Source: MDPI journal article supplement (doi:10.3390/agronomy12123067), 2022-12-03
Supplement: s1 [file s1 › agronomy-2012308-Supplementary Tables.xlsx]

## Sheet: Table S1
Table S1. RT-qPCR primers for validation of RNA-Seq data.
Gene_ID	Primer-Forward	Primer-Reverse
arahy.Tifrunner.gnm2.ann1.V4B8PK	AATCCGACGTCCAGTTTTATG	TATTGCCATAGGTTCCAGAAG
arahy.Tifrunner.gnm2.ann1.VJ6NUA	GAGCATTGAAGAGCTACCAGTGCTCATC	GCAGACAGCCTTGTTGCCATAGTAGCCA
arahy.Tifrunner.gnm2.ann1.F1TUFL	AAGTCTAAGTTCCTTCCTGTT	GTAGCTCTTGAGACTGCCAGG
arahy.Tifrunner.gnm2.ann1.FK6HB9	GCAGTTTGCACTCAAGACCGA	TCTTGTTACCATGGGTGGTCA
arahy.Tifrunner.gnm2.ann1.YB2114	TGTCATGTGACGATCCTGAAG	CCACATGCTCTTGTGCATATC
arahy.Tifrunner.gnm2.ann1.HQ8G2J	CTCTCTAAGCTTCTACTTGCT	GGCAGAGGTTTGGACGAGATG
arahy.Tifrunner.gnm2.ann1.SY561U	TTCTGATTATTGTGACAGCAA	CTTGGAGTTCTTGATGTCCCT
ADH3	GACGCTTGGCGAGATCAACA	AACCGGACAACCACCACATG

## Sheet: Table S2
Table S2：The physical properties of AhGASA genes, including Gene_ID, sequences, theoretical pI, mo-lecular weight, length, instability index, aliphatic index, grand average of hydropathicity, and subcellular localization.
Gene	Gene_ID	Sequences	Theoretical pI	Molecular weight (average)	Length(aa)	Instability index:	Aliphatic index	Grand average of hydropathicity (GRAVY)	Subcellular localization
arahy.Tifrunner.gnm2.ann1.EPT56A.1	AhGASA5	MHNNCDSECKRRCALSSRPNLCERACGTCCNRCNCVPSGTSGHYEECPCYANQTTHGGVD	6.77	6544.26	60	94.88	27.67	-0.782	nucl
arahy.Tifrunner.gnm2.ann1.FJ610L.2	AhGASA21	MAKFFAAFILALIAISMLQTMVMAANGQGGHLYDNKSQYGPGSVKSYQCPSQCSRRCGKTQYHKPCMFFCQKCCRKCLCVPPGYYGNKAVCPCYNNWKTKEGGPKCP	9.3	11884	107	43.27	47.48	-0.264	extr
arahy.Tifrunner.gnm2.ann1.RUJ0QA.1	AhGASA22	MAFNKSILLLGIFLVMATSKVSSYNEDLKMQVSYTKPPVGATSAPPKPPSTTTPPPPVTSTVPTPPKAKAPYTPVVKAPPPPFVKSPSYPPPPPPPTPTPIPTPTPPKVISPPTPYHPPVVNPPVTPTPAPPTSHIVKSNKECVPRCGYRCQLHSRTRVCMRACMTCCERCKCVPPGTYGNREKCGKCYTGMVTHGNRSKCP	9.7	21629.5	202	59.52	51.53	-0.437	extr
arahy.Tifrunner.gnm2.ann1.F1TUFL.1	AhGASA40	MAKSKFLPVFILALIVISMLQTVVMASHGHGGHHYNDQRKYGPGSLKSYQCPSKCSTRCSRTQYHKPCMFFCQKCCNKCLCVPPGYYGNKAVCPCYNNWKTKEGGPKCP	9.37	12231.5	109	39.61	51.83	-0.349	extr
arahy.Tifrunner.gnm2.ann1.V89RV5.1	AhGASA3	MAFNKSILLLGIFLVMATSKVSSYNEDLKMQVSYTKPPVGATSAPPKPPGTTTPPPPLTTTVPTPPKAKAPYTPVVKVPPPPFVKSPSYPPPPPPPTPTPTPPKVISPPTPYHPPVVNPPVTPTPAPPTSPIVKSNKDCVPRCGYRCQLHSRTRVCMRACMTCCERCKCVPPGTYGNREKCGKCYTDMVTHGNRSKCP	9.63	21251.1	198	56.5	52.07	-0.444	extr
arahy.Tifrunner.gnm2.ann1.GK9ADN.1	AhGASA32	TNFCSISAQSGDKSTADPLGHGLNSSKACRTNQRRRGTKKSHLSMHIEGRSAQIGALLLGLKYCGICCQECKCVPSGTYGNKHECPCYRDKVNKKGMWNNK	9.48	11064.7	101	54.08	53.17	-0.758	nucl
arahy.Tifrunner.gnm2.ann1.JGC745.1	AhGASA8	MAARSSTSSIVFIALSLLLLLTFSNVAEAYGSARLRPSDCKPRCSYRCSATSHKKPCMFFCQKCCAKCLCVPPGTYGNKQVCPCYNTWKTKEGGPKCP	9.28	10712.7	98	33.78	59.8	-0.072	extr
arahy.Tifrunner.gnm2.ann1.V4B8PK.1	AhGASA7	MKLSFVTLLLVCLVLTSSFFEASMARPVLCGAKCARRCSKAGMKDRCLRFCGICCSKCKCVPSGTYGNKHECPCYRDMRNSKGKPKCP	9.43	9724.79	88	33.88	62.05	0	extr
arahy.Tifrunner.gnm2.ann1.VES4LD.1	AhGASA25	MKLSFVTLLLVCLVLTSSFFEASMASPVLCGAKCARRCSKAGMKDRCLRFCGICCSKCKCVPSGTYGNKHECPCYRDMRNSKGKPKCP	9.33	9655.68	88	36.69	62.05	0.042	extr
arahy.Tifrunner.gnm2.ann1.6NEU1T.1	AhGASA16	MQAMASTRTTTLVLFIICLIFIQELEIHGMEIQGENQDMAAAHQHIDCGGKCGYRCSKAGRPKMCMRACKTCCQRCNCVPPGTAGNQNACPCYASLTTHGGKLKCP	8.6	11471.5	106	38.8	62.74	-0.1	extr
arahy.Tifrunner.gnm2.ann1.AVE3D2.1	AhGASA4	MATTLTIFMLFLVAMLLLPLKNHAEIIDAATTEAPAPQPNTNISTSNHFPINHGITEGSLKPTECGPRCTTRCSKTQYKKPCLFFCQKCCAKCLCVPPGTYGNKQVCPCYNNWKTKRGGPKCP	9.08	13509.9	123	39.44	64.31	-0.205	extr
arahy.Tifrunner.gnm2.ann1.RMUP98.1	AhGASA12	MALSKLLAASLIVSFLLLHLGEAYESQEAPQQTIEDSVNNKKIDCSGACSVRCSKASRQRMCKRACGTCCQRCNCVPPGTSGNQKLCPCYYNQTTHGGRRKCP	9.01	11218	103	50.49	64.47	-0.378	extr
arahy.Tifrunner.gnm2.ann1.VLT6V3.1	AhGASA24	MATTLTIVMLFLVAMLLLPLKNHAEIIDAATTEAPAPQPNTNITTSNHFPINHGITEGSLKPTECGPRCTTRCSKTQYKKPCLFFCQKCCAKCLCVPPGTYGNKQVCPCYNNWKTKRGGPKCP	9.08	13475.9	123	38.75	66.67	-0.193	extr
arahy.Tifrunner.gnm2.ann1.6SHE48.1	AhGASA9	MAMAKAKLVSVLLLALLIAISAISAKQVMAKEAAQYHLDSGSYGPGSLKSYQCPSQCARRCGQTQYHKPCMFFCQKCCAKCLCVPPGYYGNKAVCPCYNNWKTKRGGPKCP	9.37	12077.4	111	36.98	66.94	-0.065	extr
arahy.Tifrunner.gnm2.ann1.6KJ02L.1	AhGASA28	MALSKLLAASLILSFLLLQLSVDAADKSEVPTVEGAVPGPKIDCKGKCDFRCSKSSHPNLCKRSCNTCCQRCNCVPPGTSGNYETCPCYYAQTTHGGKRKCP	8.76	10916.7	102	35.92	66.96	-0.217	extr
arahy.Tifrunner.gnm2.ann1.RM9G1V.1	AhGASA11	MALSKLLAASLILSFLLLQLSVDAADKSEVPTVEGAVPGPKIDCKGKCDFRCSKSSHPNLCKRSCNTCCQRCNCVPPGTSGNYETCPCYYAQTTHGGKRKCP	8.76	10916.7	102	35.92	66.96	-0.217	extr
arahy.Tifrunner.gnm2.ann1.PW1K78.1	AhGASA19	MARKLSIVMLCLLVVLLIADTNAKTDASPIGAPTPATSPASSSKNGTTEGSLQPEECAPRCDVRCSKTHHKKPCLFFCKKCCAVCLCVPPGTYGNKELCPCYNNWKTKEGGPKCP	8.82	12275.5	115	47.61	67.04	-0.166	extr
arahy.Tifrunner.gnm2.ann1.CH1EP2.1	AhGASA20	MKKKMKASLQFLLAIMLVMLFFCMAKIVKGPTKKLLPFVDCGAKCEARCSAHSRKKICIRACGTCCSRCKCVPPGTYGNREVCGRCYTDMVTHGNKPKCP	9.6	11084.6	100	24.18	67.3	0.033	extr
arahy.Tifrunner.gnm2.ann1.C0SGC9.1	AhGASA27	MALSKLLAASLIVSLLLLHLGEAYESQEAPQQTIEDSVNNKKIDCSGACSVRCSKASRQRMCKRACGTCCQRCNCVPPGTSGNQKLCPCYYNQTTHGGRRKCP	9.01	11184	103	50.49	68.25	-0.368	extr
arahy.Tifrunner.gnm2.ann1.VJ6NUA.1	AhGASA31	MAMAKAKLVSLLLLALLIAISAISAQVMAKEAAQYHLDSGSYGPGSLKSYQCPSQCARRCGQTQYHKPCMFFCQKCCAKCLCVPPGYYGNKAVCPCYNNWKTKRGGPKCP	9.3	11963.2	110	35.07	68.45	-0.034	extr
arahy.Tifrunner.gnm2.ann1.YB2114.1	AhGASA2	MEKKMIASLQFLLSIMLVMLLFCMAKVSCADPEAKIHDHVTGSEVVKGPTRRLLPFVDCGAKCEARCSAHSRKKICTRACGTCCSRCKCVPPGTYGNREVCGRCYTDMVTHGNKPKCP	9.08	12959.5	118	35.11	68.56	-0.049	extr
arahy.Tifrunner.gnm2.ann1.TJLQ2T.1	AhGASA13	MKVVLASVLLLCLLLSSSFLDVSMAGSDFCDSKCGERCAKAGVKDRCLKYCGICCQKCNCVPSGTYGNKDECPCYRDMKNSKGQGKCP	8.58	9477.2	88	25.42	68.64	-0.033	extr
arahy.Tifrunner.gnm2.ann1.FBS0NK.1	AhGASA33	MASTRTTTLVLFIICLIFIQELEIHGLEEIQGGNQDMTAAHHHIDCGGKCGYRCSKAGRPKICMRACKTCCQRCNCVPPGTAGNQNACACYASLTTHGGKLKCP	8.6	11175.1	104	41.99	70.48	-0.053	extr
arahy.Tifrunner.gnm2.ann1.PX38R1.1	AhGASA34	MASTRTTTLVLFIICLIFIQELEIHGLEIHGGTQDTAAAHQHIDCGGKCGYRCSKAGRPKICMRACKTCCQRCNCVPPGTAGNQNACPCYASLTTHGGKLKCP	8.74	10998.9	103	35.02	71.17	-0.026	extr
arahy.Tifrunner.gnm2.ann1.GQW4DS.1	AhGASA38	MASTRTTTLVLFIICLIFIQELEIHGLEIHGENQDMAAAHQHIDCGGKCGYRCSKAGRPKICMRACKTCCQRCNCVPPGTAGNQNACPCYASLTTHGGKLKCP	8.6	11114	103	36.57	71.17	-0.058	extr
arahy.Tifrunner.gnm2.ann1.50JJZL.1	AhGASA37	MASTRTTTLVLFIICLIFIQELEIHGLEIHGENQDMAAAHQHIDCGGKCGYRCSKAGRPKICMRACKTCCQRCNCVPPGTAGNQNACPCYASLTTHGGKLKCP	8.6	11114	103	36.57	71.17	-0.058	extr
arahy.Tifrunner.gnm2.ann1.M8TEG5.1	AhGASA35	MASTRTTTLVLFIICLIFIQELEIHGLEIHGGTQDMAAAHQHIDCGRKCGYRCSKAGRPKICMRACKTCCQRCNCVPPGTAGNQNACPCYASLTTHGGKLKCP	8.86	11128.1	103	37.3	71.17	-0.041	extr
arahy.Tifrunner.gnm2.ann1.IN1Z0G.1	AhGASA36	MASTRTTTLVLFIICLIFIQELEIHGLEIHGENQDMAAAHQHIDCGGKCGHRCSKAGRPKICMRACKTCCQRCNCVPPGTAGNQNACPCYASLTTHGGKLKCP	8.61	11088	103	39.03	71.17	-0.077	extr
arahy.Tifrunner.gnm2.ann1.I1ZCNY.1	AhGASA15	MASIRTTTLVLFIICLIFIQELEIHGLEIHGENQDMAAAHQHIDCGGKCGYRCSKAGRPKMCMRACKTCCQRCNCVPPGTARNQNACPCYASLTTHGGKLKCP	8.74	11243.3	103	42.58	71.17	-0.073	extr
arahy.Tifrunner.gnm2.ann1.7Y3SM7.1	AhGASA14	MKLIFVTLLLCFLLLSSSLLEPATAYEDASYCGKKCSDRCSVAGVKDRCLKYCGICCQECKCVPSGTYGNKHECPCYRDKVNKKGKPKCP	8.8	9955.84	90	29.07	72.56	-0.127	extr
arahy.Tifrunner.gnm2.ann1.XG1GJV.1	AhGASA39	MKLIFVTLLLCFLLLSSSLLEPATAYEDASYCGKKCSNRCSVAGVKDRCLKYCGICCQECKCVPSGTYGNKHECPCYRDKVNKKGKPKCP	8.9	9954.86	90	29.91	72.56	-0.127	extr
arahy.Tifrunner.gnm2.ann1.SY561U.1	AhGASA30	MKVVLASVLLLCLLLSSSFLDVSMAGSDFCDSKCGERCAKAGVKDRCLKYCGICCQKCNCVPSGTYGNKDECPCYRDIKNSKGQGKCP	8.58	9459.16	88	24.46	73.07	-0.003	extr
arahy.Tifrunner.gnm2.ann1.RF89RI.1	AhGASA17	MDSIFSHPTIFCVTYLCNLLSLSCHLRKLSRQAMTSTRTTTLVLFIICLIFIQELEIHGLEIDGGNQDMAAAHQHIDCGGKCGYRCSKAGRPKICMRACKTCCQRCNCVPPGTAGNQNACPCYASLTTHGGKLKCP	8.72	14830.5	136	38.14	78.97	0.066	chlo
arahy.Tifrunner.gnm2.ann1.K28R5D.1	AhGASA26	MIISFRYKYLPKYSNSYIISNTSLLVFAFLFFLYSESELFIQFVPHIIAMAARSSTSSIVFIALSLLLLVTFSNVAEAYGSARLRPSDCKPRCSYRCSATSHKKPCMFFCQKCCAKCLCVPPGTYGNKQVCPCYNTWKTKEGGPKCP	9.27	16556.6	147	33.21	78.98	0.218	E.R
arahy.Tifrunner.gnm2.ann1.0QC0PL.1	AhGASA10	MALSKLLPVSLILSFLLLQHLIEDNQLVSSEGLHGSLNVEKIDCNEACDVRCSKSSRPDLCKRACGTCCQRCNCVPPGYSGNQRACPCYYNQITHGGKRKCP	8.48	11202	102	54.3	83.14	-0.215	extr
arahy.Tifrunner.gnm2.ann1.XBXR9Z.1	AhGASA29	MALSKLLPVSLILSFLLLQHLIEDNQLVSSEGLHGSLTVERIDCNEACDVRCSKTSRPDLCKRACGTCCQRCNCVPPGYSGNQRACPCYYNQITHGGRRKCP	8.49	11259.1	102	56.5	83.14	-0.198	extr
arahy.Tifrunner.gnm2.ann1.QLA9Z7.1	AhGASA6	MALSKLLLASLLASLLIIQLVHADHQAYQQTQGSLQQIDCSGACAARCRLSSRPNLCRRACGTCCQRCNCVPPGTAGNQEVCPCYASLTTHGGKRKCP	8.94	10434.2	98	44.69	83.78	-0.014	extr
arahy.Tifrunner.gnm2.ann1.HQ8G2J.1	AhGASA23	MALSKLLLASLLASLLIIQLVHADHQAYQQTQGSLQQIDCSGACAARCRLSSRPNLCRRACGTCCQRCNCVPPGTAGNQEVCPCYASLTTHGGRRKCP	8.95	10462.2	98	48.07	83.78	-0.02	extr
arahy.Tifrunner.gnm2.ann1.FK6HB9.1	AhGASA1	MALSRVVLLLGVFLLLCLSKVSSDVKIEDEDDEQLSLPADKPLIVRDSNRRLMQDIDCGGLCKERCSLHSRPNLCNRACGTCCVRCKCVPPGTAGNRELCGSCYTDMTTHGNKTKCP	7.95	12805	117	42.72	86.58	-0.146	extr
arahy.Tifrunner.gnm2.ann1.H0C812.1	AhGASA18	MALSRVVLLLGVLLLLCLSKVSSDVKIEDEDDEQLSLPADKPLIVRDSNRRLMQDIDCGGLCKERCSLHSRPNLCNRACGTCCVRCKCVPPGTAGNRELCGSCYTDMTTHVCAFLVAVVMDCA	6.06	13364.7	123	39.17	100.57	0.224	extr

## Sheet: Table S3
Table S3：The common linear gene pairs between A. duranensis and A. ipaensis.
Ad-aradu.V14167.gnm1.ann1.Aradu.KPI4B.1	Ah-arahy.Tifrunner.gnm2.ann1.V4B8PK.1
Ad-aradu.V14167.gnm1.ann1.Aradu.KPI4B.1	Ah-arahy.Tifrunner.gnm2.ann1.TJLQ2T.1
Ad-aradu.V14167.gnm1.ann1.Aradu.KPI4B.1	Ah-arahy.Tifrunner.gnm2.ann1.7Y3SM7.1
Ad-aradu.V14167.gnm1.ann1.Aradu.KPI4B.1	Ah-arahy.Tifrunner.gnm2.ann1.VES4LD.1
Ad-aradu.V14167.gnm1.ann1.Aradu.KPI4B.1	Ah-arahy.Tifrunner.gnm2.ann1.SY561U.1
Ad-aradu.V14167.gnm1.ann1.Aradu.KPI4B.1	Ah-arahy.Tifrunner.gnm2.ann1.XG1GJV.1
Ad-aradu.V14167.gnm1.ann1.Aradu.5HD3X.1	Ah-arahy.Tifrunner.gnm2.ann1.V4B8PK.1
Ad-aradu.V14167.gnm1.ann1.Aradu.5HD3X.1	Ah-arahy.Tifrunner.gnm2.ann1.TJLQ2T.1
Ad-aradu.V14167.gnm1.ann1.Aradu.5HD3X.1	Ah-arahy.Tifrunner.gnm2.ann1.VES4LD.1
Ad-aradu.V14167.gnm1.ann1.Aradu.5HD3X.1	Ah-arahy.Tifrunner.gnm2.ann1.SY561U.1
Ad-aradu.V14167.gnm1.ann1.Aradu.G5E45.1	Ah-arahy.Tifrunner.gnm2.ann1.V4B8PK.1
Ad-aradu.V14167.gnm1.ann1.Aradu.G5E45.1	Ah-arahy.Tifrunner.gnm2.ann1.TJLQ2T.1
Ad-aradu.V14167.gnm1.ann1.Aradu.G5E45.1	Ah-arahy.Tifrunner.gnm2.ann1.7Y3SM7.1
Ad-aradu.V14167.gnm1.ann1.Aradu.G5E45.1	Ah-arahy.Tifrunner.gnm2.ann1.VES4LD.1
Ad-aradu.V14167.gnm1.ann1.Aradu.G5E45.1	Ah-arahy.Tifrunner.gnm2.ann1.SY561U.1
Ad-aradu.V14167.gnm1.ann1.Aradu.G5E45.1	Ah-arahy.Tifrunner.gnm2.ann1.XG1GJV.1
Ad-aradu.V14167.gnm1.ann1.Aradu.Q5JWU.1	Ah-arahy.Tifrunner.gnm2.ann1.I1ZCNY.1
Ad-aradu.V14167.gnm1.ann1.Aradu.Q5JWU.1	Ah-arahy.Tifrunner.gnm2.ann1.FBS0NK.1
Ad-aradu.V14167.gnm1.ann1.Aradu.M0E3H.1	Ah-arahy.Tifrunner.gnm2.ann1.AVE3D2.1
Ad-aradu.V14167.gnm1.ann1.Aradu.M0E3H.1	Ah-arahy.Tifrunner.gnm2.ann1.VLT6V3.1
Ad-aradu.V14167.gnm1.ann1.Aradu.8V764.1	Ah-arahy.Tifrunner.gnm2.ann1.X9WA5F.1
Ad-aradu.V14167.gnm1.ann1.Aradu.8V764.1	Ah-arahy.Tifrunner.gnm2.ann1.FJ610L.1
Ad-aradu.V14167.gnm1.ann1.Aradu.8V764.1	Ah-arahy.Tifrunner.gnm2.ann1.F1TUFL.1
Ad-aradu.V14167.gnm1.ann1.Aradu.1X6Z1.1	Ah-arahy.Tifrunner.gnm2.ann1.QLA9Z7.1
Ad-aradu.V14167.gnm1.ann1.Aradu.P8BUT.1	Ah-arahy.Tifrunner.gnm2.ann1.JGC745.1
Ad-aradu.V14167.gnm1.ann1.Aradu.P8BUT.1	Ah-arahy.Tifrunner.gnm2.ann1.K28R5D.1
Ad-aradu.V14167.gnm1.ann1.Aradu.C924Y.1	Ah-arahy.Tifrunner.gnm2.ann1.6SHE48.1
Ad-aradu.V14167.gnm1.ann1.Aradu.FS4N2.1	Ah-arahy.Tifrunner.gnm2.ann1.EPT56A.1
Ad-aradu.V14167.gnm1.ann1.Aradu.FS4N2.1	Ah-arahy.Tifrunner.gnm2.ann1.0QC0PL.1
Ad-aradu.V14167.gnm1.ann1.Aradu.FS4N2.1	Ah-arahy.Tifrunner.gnm2.ann1.HQ8G2J.1
Ad-aradu.V14167.gnm1.ann1.Aradu.FS4N2.1	Ah-arahy.Tifrunner.gnm2.ann1.C0SGC9.1
Ad-aradu.V14167.gnm1.ann1.Aradu.ZC5ID.1	Ah-arahy.Tifrunner.gnm2.ann1.0QC0PL.1
Ad-aradu.V14167.gnm1.ann1.Aradu.ZC5ID.1	Ah-arahy.Tifrunner.gnm2.ann1.HQ8G2J.1
Ad-aradu.V14167.gnm1.ann1.Aradu.ZC5ID.1	Ah-arahy.Tifrunner.gnm2.ann1.C0SGC9.1
Ad-aradu.V14167.gnm1.ann1.Aradu.P4ZIH.1	Ah-arahy.Tifrunner.gnm2.ann1.EPT56A.1
Ad-aradu.V14167.gnm1.ann1.Aradu.0E8DM.1	Ah-arahy.Tifrunner.gnm2.ann1.V89RV5.1
Ad-aradu.V14167.gnm1.ann1.Aradu.0E8DM.1	Ah-arahy.Tifrunner.gnm2.ann1.RUJ0QA.1
Ad-aradu.V14167.gnm1.ann1.Aradu.CYG6N.1	Ah-arahy.Tifrunner.gnm2.ann1.FK6HB9.1
Ad-aradu.V14167.gnm1.ann1.Aradu.CYG6N.1	Ah-arahy.Tifrunner.gnm2.ann1.H0C812.1
Ah-arahy.Tifrunner.gnm2.ann1.YB2114.1	Ai-araip.K30076.gnm1.ann1.Araip.27I5U.1
Ah-arahy.Tifrunner.gnm2.ann1.V89RV5.1	Ai-araip.K30076.gnm1.ann1.Araip.VQ4D8.1
Ah-arahy.Tifrunner.gnm2.ann1.AVE3D2.1	Ai-araip.K30076.gnm1.ann1.Araip.D52UU.1
Ah-arahy.Tifrunner.gnm2.ann1.EPT56A.1	Ai-araip.K30076.gnm1.ann1.Araip.TG4Z7.1
Ah-arahy.Tifrunner.gnm2.ann1.EPT56A.1	Ai-araip.K30076.gnm1.ann1.Araip.ZQ9EU.1
Ah-arahy.Tifrunner.gnm2.ann1.QLA9Z7.1	Ai-araip.K30076.gnm1.ann1.Araip.T84RU.1
Ah-arahy.Tifrunner.gnm2.ann1.V4B8PK.1	Ai-araip.K30076.gnm1.ann1.Araip.VM6WY.1
Ah-arahy.Tifrunner.gnm2.ann1.JGC745.1	Ai-araip.K30076.gnm1.ann1.Araip.80K4W.1
Ah-arahy.Tifrunner.gnm2.ann1.0QC0PL.1	Ai-araip.K30076.gnm1.ann1.Araip.T84RU.1
Ah-arahy.Tifrunner.gnm2.ann1.TJLQ2T.1	Ai-araip.K30076.gnm1.ann1.Araip.VM6WY.1
Ah-arahy.Tifrunner.gnm2.ann1.I1ZCNY.1	Ai-araip.K30076.gnm1.ann1.Araip.RBE2T.1
Ah-arahy.Tifrunner.gnm2.ann1.PW1K78.1	Ai-araip.K30076.gnm1.ann1.Araip.D52UU.1
Ah-arahy.Tifrunner.gnm2.ann1.RUJ0QA.1	Ai-araip.K30076.gnm1.ann1.Araip.VQ4D8.1
Ah-arahy.Tifrunner.gnm2.ann1.HQ8G2J.1	Ai-araip.K30076.gnm1.ann1.Araip.TG4Z7.1
Ah-arahy.Tifrunner.gnm2.ann1.HQ8G2J.1	Ai-araip.K30076.gnm1.ann1.Araip.T84RU.1
Ah-arahy.Tifrunner.gnm2.ann1.VLT6V3.1	Ai-araip.K30076.gnm1.ann1.Araip.D52UU.1
Ah-arahy.Tifrunner.gnm2.ann1.VES4LD.1	Ai-araip.K30076.gnm1.ann1.Araip.VM6WY.1
Ah-arahy.Tifrunner.gnm2.ann1.K28R5D.1	Ai-araip.K30076.gnm1.ann1.Araip.80K4W.1
Ah-arahy.Tifrunner.gnm2.ann1.C0SGC9.1	Ai-araip.K30076.gnm1.ann1.Araip.T84RU.1
Ah-arahy.Tifrunner.gnm2.ann1.SY561U.1	Ai-araip.K30076.gnm1.ann1.Araip.VM6WY.1
Ah-arahy.Tifrunner.gnm2.ann1.FBS0NK.1	Ai-araip.K30076.gnm1.ann1.Araip.RBE2T.1
Ah-arahy.Tifrunner.gnm2.ann1.F1TUFL.1	Ai-araip.K30076.gnm1.ann1.Araip.B4LS2.1
Ah-arahy.Tifrunner.gnm2.ann1.F1TUFL.1	Ai-araip.K30076.gnm1.ann1.Araip.9I7A7.1
Ah-arahy.Tifrunner.gnm2.ann1.X9WA5F.1	Ai-araip.K30076.gnm1.ann1.Araip.9I7A7.1
Ah-arahy.Tifrunner.gnm2.ann1.FJ610L.1	Ai-araip.K30076.gnm1.ann1.Araip.9I7A7.1
Ah-arahy.Tifrunner.gnm2.ann1.X9WA5F.1	Ai-araip.K30076.gnm1.ann1.Araip.B4LS2.1
Ah-arahy.Tifrunner.gnm2.ann1.GK9ADN.2	Ai-araip.K30076.gnm1.ann1.Araip.AY7YU.1
Ah-arahy.Tifrunner.gnm2.ann1.GB08AC.1	Ai-araip.K30076.gnm1.ann1.Araip.I99VF.1

## Sheet: Table S4
Table S4：The common linear gene pairs between A. hypogaea L., and Glycine max L.
Ah-arahy.Tifrunner.gnm2.ann1.FK6HB9.1	Mt-rna-XM_003608914.4
Ah-arahy.Tifrunner.gnm2.ann1.YB2114.1	Mt-rna-XM_013595416.3
Ah-arahy.Tifrunner.gnm2.ann1.YB2114.1	Mt-rna-XM_003628582.3
Ah-arahy.Tifrunner.gnm2.ann1.V89RV5.1	Mt-rna-XM_013595416.3
Ah-arahy.Tifrunner.gnm2.ann1.AVE3D2.1	Mt-rna-XM_003625020.4
Ah-arahy.Tifrunner.gnm2.ann1.EPT56A.1	Mt-rna-XM_003589438.4
Ah-arahy.Tifrunner.gnm2.ann1.EPT56A.1	Mt-rna-XM_039832183.1
Ah-arahy.Tifrunner.gnm2.ann1.V4B8PK.1	Mt-rna-XM_003589066.4
Ah-arahy.Tifrunner.gnm2.ann1.V4B8PK.1	Mt-rna-XM_013606291.3
Ah-arahy.Tifrunner.gnm2.ann1.0QC0PL.1	Mt-rna-XM_003589438.4
Ah-arahy.Tifrunner.gnm2.ann1.0QC0PL.1	Mt-rna-XM_039832183.1
Ah-arahy.Tifrunner.gnm2.ann1.0QC0PL.1	Mt-rna-XM_003629278.4
Ah-arahy.Tifrunner.gnm2.ann1.TJLQ2T.1	Mt-rna-XM_003589066.4
Ah-arahy.Tifrunner.gnm2.ann1.TJLQ2T.1	Mt-rna-XM_013606291.3
Ah-arahy.Tifrunner.gnm2.ann1.7Y3SM7.1	Mt-rna-XM_013614549.3
Ah-arahy.Tifrunner.gnm2.ann1.7Y3SM7.1	Mt-rna-XM_003589066.4
Ah-arahy.Tifrunner.gnm2.ann1.7Y3SM7.1	Mt-rna-XM_013606291.3
Ah-arahy.Tifrunner.gnm2.ann1.I1ZCNY.1	Mt-rna-XM_013614063.3
Ah-arahy.Tifrunner.gnm2.ann1.H0C812.1	Mt-rna-XM_003608914.4
Ah-arahy.Tifrunner.gnm2.ann1.H0C812.1	Mt-rna-XM_003628582.3
Ah-arahy.Tifrunner.gnm2.ann1.CH1EP2.1	Mt-rna-XM_013595416.3
Ah-arahy.Tifrunner.gnm2.ann1.CH1EP2.1	Mt-rna-XM_003628582.3
Ah-arahy.Tifrunner.gnm2.ann1.RUJ0QA.1	Mt-rna-XM_013595416.3
Ah-arahy.Tifrunner.gnm2.ann1.HQ8G2J.1	Mt-rna-XM_003589438.4
Ah-arahy.Tifrunner.gnm2.ann1.HQ8G2J.1	Mt-rna-XM_039832183.1
Ah-arahy.Tifrunner.gnm2.ann1.VLT6V3.1	Mt-rna-XM_003625020.4
Ah-arahy.Tifrunner.gnm2.ann1.VES4LD.1	Mt-rna-XM_003589066.4
Ah-arahy.Tifrunner.gnm2.ann1.VES4LD.1	Mt-rna-XM_013606291.3
Ah-arahy.Tifrunner.gnm2.ann1.C0SGC9.1	Mt-rna-XM_003589438.4
Ah-arahy.Tifrunner.gnm2.ann1.C0SGC9.1	Mt-rna-XM_039832183.1
Ah-arahy.Tifrunner.gnm2.ann1.SY561U.1	Mt-rna-XM_003589066.4
Ah-arahy.Tifrunner.gnm2.ann1.SY561U.1	Mt-rna-XM_013606291.3
Ah-arahy.Tifrunner.gnm2.ann1.FBS0NK.1	Mt-rna-XM_013614063.3
Ah-arahy.Tifrunner.gnm2.ann1.XG1GJV.1	Mt-rna-XM_013614549.3
Ah-arahy.Tifrunner.gnm2.ann1.XG1GJV.1	Mt-rna-XM_003589066.4
Ah-arahy.Tifrunner.gnm2.ann1.XG1GJV.1	Mt-rna-XM_013606291.3
Ah-arahy.Tifrunner.gnm2.ann1.F1TUFL.1	Mt-rna-XM_003618450.3
Ah-arahy.Tifrunner.gnm2.ann1.F1TUFL.1	Mt-rna-XM_003621169.4

## Sheet: Table S5
Table S5：The common linear gene pairs between A. hypogaea L., and M. truncatula L.
Ah-arahy.Tifrunner.gnm2.ann1.FK6HB9.1	Gm-rna-NM_001249541.3
Ah-arahy.Tifrunner.gnm2.ann1.FK6HB9.1	Gm-rna-NM_001250246.3
Ah-arahy.Tifrunner.gnm2.ann1.FK6HB9.1	Gm-rna-XM_041016586.1
Ah-arahy.Tifrunner.gnm2.ann1.FK6HB9.1	Gm-rna-NM_001371556.1
Ah-arahy.Tifrunner.gnm2.ann1.YB2114.1	Gm-rna-NM_001248729.2
Ah-arahy.Tifrunner.gnm2.ann1.YB2114.1	Gm-rna-NM_001371556.1
Ah-arahy.Tifrunner.gnm2.ann1.YB2114.1	Gm-rna-NM_001371561.1
Ah-arahy.Tifrunner.gnm2.ann1.V89RV5.1	Gm-rna-NM_001248729.2
Ah-arahy.Tifrunner.gnm2.ann1.V89RV5.1	Gm-rna-NM_001248895.2
Ah-arahy.Tifrunner.gnm2.ann1.V89RV5.1	Gm-rna-NM_001250459.3
Ah-arahy.Tifrunner.gnm2.ann1.AVE3D2.1	Gm-rna-NM_001248099.2
Ah-arahy.Tifrunner.gnm2.ann1.AVE3D2.1	Gm-rna-NM_001371562.1
Ah-arahy.Tifrunner.gnm2.ann1.EPT56A.1	Gm-rna-XM_003527602.4
Ah-arahy.Tifrunner.gnm2.ann1.EPT56A.1	Gm-rna-NM_001250215.3
Ah-arahy.Tifrunner.gnm2.ann1.EPT56A.1	Gm-rna-NM_001251755.3
Ah-arahy.Tifrunner.gnm2.ann1.QLA9Z7.1	Gm-rna-NM_001252707.2
Ah-arahy.Tifrunner.gnm2.ann1.V4B8PK.1	Gm-rna-NM_001371564.1
Ah-arahy.Tifrunner.gnm2.ann1.V4B8PK.1	Gm-rna-NM_001250055.2
Ah-arahy.Tifrunner.gnm2.ann1.V4B8PK.1	Gm-rna-NM_001371557.1
Ah-arahy.Tifrunner.gnm2.ann1.JGC745.1	Gm-rna-XM_003544943.4
Ah-arahy.Tifrunner.gnm2.ann1.0QC0PL.1	Gm-rna-NM_001252707.2
Ah-arahy.Tifrunner.gnm2.ann1.0QC0PL.1	Gm-rna-XM_003527602.4
Ah-arahy.Tifrunner.gnm2.ann1.0QC0PL.1	Gm-rna-NM_001250215.3
Ah-arahy.Tifrunner.gnm2.ann1.0QC0PL.1	Gm-rna-NM_001251755.3
Ah-arahy.Tifrunner.gnm2.ann1.RMUP98.1	Gm-rna-NM_001250090.3
Ah-arahy.Tifrunner.gnm2.ann1.TJLQ2T.1	Gm-rna-NM_001371564.1
Ah-arahy.Tifrunner.gnm2.ann1.TJLQ2T.1	Gm-rna-NM_001250055.2
Ah-arahy.Tifrunner.gnm2.ann1.TJLQ2T.1	Gm-rna-NM_001371557.1
Ah-arahy.Tifrunner.gnm2.ann1.7Y3SM7.1	Gm-rna-NM_001371550.1
Ah-arahy.Tifrunner.gnm2.ann1.7Y3SM7.1	Gm-rna-NM_001250055.2
Ah-arahy.Tifrunner.gnm2.ann1.7Y3SM7.1	Gm-rna-NM_001371557.1
Ah-arahy.Tifrunner.gnm2.ann1.7Y3SM7.1	Gm-rna-NM_001250396.2
Ah-arahy.Tifrunner.gnm2.ann1.I1ZCNY.1	Gm-rna-XM_006589393.4
Ah-arahy.Tifrunner.gnm2.ann1.I1ZCNY.1	Gm-rna-XM_006606155.3
Ah-arahy.Tifrunner.gnm2.ann1.H0C812.1	Gm-rna-NM_001249541.3
Ah-arahy.Tifrunner.gnm2.ann1.H0C812.1	Gm-rna-NM_001250246.3
Ah-arahy.Tifrunner.gnm2.ann1.H0C812.1	Gm-rna-XM_041016586.1
Ah-arahy.Tifrunner.gnm2.ann1.H0C812.1	Gm-rna-NM_001371556.1
Ah-arahy.Tifrunner.gnm2.ann1.PW1K78.1	Gm-rna-NM_001248099.2
Ah-arahy.Tifrunner.gnm2.ann1.PW1K78.1	Gm-rna-NM_001371562.1
Ah-arahy.Tifrunner.gnm2.ann1.CH1EP2.1	Gm-rna-NM_001248729.2
Ah-arahy.Tifrunner.gnm2.ann1.CH1EP2.1	Gm-rna-NM_001371561.1
Ah-arahy.Tifrunner.gnm2.ann1.RUJ0QA.1	Gm-rna-NM_001248895.2
Ah-arahy.Tifrunner.gnm2.ann1.RUJ0QA.1	Gm-rna-NM_001250459.3
Ah-arahy.Tifrunner.gnm2.ann1.HQ8G2J.1	Gm-rna-NM_001252707.2
Ah-arahy.Tifrunner.gnm2.ann1.HQ8G2J.1	Gm-rna-XM_003527602.4
Ah-arahy.Tifrunner.gnm2.ann1.HQ8G2J.1	Gm-rna-NM_001250215.3
Ah-arahy.Tifrunner.gnm2.ann1.HQ8G2J.1	Gm-rna-NM_001251755.3
Ah-arahy.Tifrunner.gnm2.ann1.VLT6V3.1	Gm-rna-NM_001248099.2
Ah-arahy.Tifrunner.gnm2.ann1.VLT6V3.1	Gm-rna-NM_001371562.1
Ah-arahy.Tifrunner.gnm2.ann1.VES4LD.1	Gm-rna-NM_001371564.1
Ah-arahy.Tifrunner.gnm2.ann1.VES4LD.1	Gm-rna-NM_001250055.2
Ah-arahy.Tifrunner.gnm2.ann1.VES4LD.1	Gm-rna-NM_001371557.1
Ah-arahy.Tifrunner.gnm2.ann1.VES4LD.1	Gm-rna-NM_001250396.2
Ah-arahy.Tifrunner.gnm2.ann1.K28R5D.1	Gm-rna-XM_003544943.4
Ah-arahy.Tifrunner.gnm2.ann1.C0SGC9.1	Gm-rna-NM_001252707.2
Ah-arahy.Tifrunner.gnm2.ann1.C0SGC9.1	Gm-rna-XM_003527602.4
Ah-arahy.Tifrunner.gnm2.ann1.C0SGC9.1	Gm-rna-NM_001250215.3
Ah-arahy.Tifrunner.gnm2.ann1.C0SGC9.1	Gm-rna-NM_001251755.3
Ah-arahy.Tifrunner.gnm2.ann1.SY561U.1	Gm-rna-NM_001371564.1
Ah-arahy.Tifrunner.gnm2.ann1.SY561U.1	Gm-rna-NM_001250055.2
Ah-arahy.Tifrunner.gnm2.ann1.SY561U.1	Gm-rna-NM_001371557.1
Ah-arahy.Tifrunner.gnm2.ann1.FBS0NK.1	Gm-rna-XM_006589393.4
Ah-arahy.Tifrunner.gnm2.ann1.FBS0NK.1	Gm-rna-XM_006606155.3
Ah-arahy.Tifrunner.gnm2.ann1.XG1GJV.1	Gm-rna-NM_001371564.1
Ah-arahy.Tifrunner.gnm2.ann1.XG1GJV.1	Gm-rna-NM_001371550.1
Ah-arahy.Tifrunner.gnm2.ann1.XG1GJV.1	Gm-rna-NM_001250055.2
Ah-arahy.Tifrunner.gnm2.ann1.XG1GJV.1	Gm-rna-NM_001371557.1
Ah-arahy.Tifrunner.gnm2.ann1.XG1GJV.1	Gm-rna-NM_001250396.2
Ah-arahy.Tifrunner.gnm2.ann1.F1TUFL.1	Gm-rna-NM_001248538.3
Ah-arahy.Tifrunner.gnm2.ann1.F1TUFL.1	Gm-rna-NM_001253155.3
Ah-arahy.Tifrunner.gnm2.ann1.F1TUFL.1	Gm-rna-NM_001249065.3

## Sheet: Table S6
Table S6:There are 21 cis-acting elements linked to phytohormones, light response, and tissue-specific expression.
arahy.Tifrunner.gnm2.ann1.0QC0PL.1	1989	2000	cis-acting regulatory element involved in light responsiveness
arahy.Tifrunner.gnm2.ann1.0QC0PL.1	1526	1532	light responsive element
arahy.Tifrunner.gnm2.ann1.0QC0PL.1	1341	1347	MYBHv1 binding site
arahy.Tifrunner.gnm2.ann1.0QC0PL.1	1297	1304	MYB binding site involved in light responsiveness
arahy.Tifrunner.gnm2.ann1.0QC0PL.1	1099	1105	light responsive element
arahy.Tifrunner.gnm2.ann1.0QC0PL.1	1065	1071	cis-acting element involved in low-temperature responsiveness
arahy.Tifrunner.gnm2.ann1.0QC0PL.1	906	911	cis-acting element involved in the abscisic acid responsiveness
arahy.Tifrunner.gnm2.ann1.0QC0PL.1	906	912	cis-acting regulatory element involved in light responsiveness
arahy.Tifrunner.gnm2.ann1.0QC0PL.1	519	526	light responsive element
arahy.Tifrunner.gnm2.ann1.0QC0PL.1	516	523	MYB binding site involved in light responsiveness
arahy.Tifrunner.gnm2.ann1.0QC0PL.1	434	439	cis-acting regulatory element involved in the MeJA-responsiveness
arahy.Tifrunner.gnm2.ann1.0QC0PL.1	434	439	cis-acting regulatory element involved in the MeJA-responsiveness
arahy.Tifrunner.gnm2.ann1.0QC0PL.1	397	403	part of a conserved DNA module involved in light responsiveness
arahy.Tifrunner.gnm2.ann1.0QC0PL.1	107	112	cis-acting element involved in the abscisic acid responsiveness
arahy.Tifrunner.gnm2.ann1.0QC0PL.1	107	113	cis-acting regulatory element involved in light responsiveness
arahy.Tifrunner.gnm2.ann1.0QC0PL.1	568	574	auxin-responsive element
arahy.Tifrunner.gnm2.ann1.50JJZL.1	1788	1794	MYB binding site involved in drought-inducibility
arahy.Tifrunner.gnm2.ann1.50JJZL.1	1534	1539	cis-acting regulatory element involved in the MeJA-responsiveness
arahy.Tifrunner.gnm2.ann1.50JJZL.1	1534	1539	cis-acting regulatory element involved in the MeJA-responsiveness
arahy.Tifrunner.gnm2.ann1.50JJZL.1	1485	1491	cis-acting regulatory element involved in light responsiveness
arahy.Tifrunner.gnm2.ann1.50JJZL.1	1485	1490	cis-acting element involved in the abscisic acid responsiveness
arahy.Tifrunner.gnm2.ann1.50JJZL.1	1177	1186	cis-acting regulatory element involved in circadian control
arahy.Tifrunner.gnm2.ann1.50JJZL.1	1125	1134	cis-acting regulatory element involved in circadian control
arahy.Tifrunner.gnm2.ann1.50JJZL.1	1099	1105	light responsive element
arahy.Tifrunner.gnm2.ann1.50JJZL.1	1098	1105	light responsive element
arahy.Tifrunner.gnm2.ann1.50JJZL.1	1082	1088	part of a conserved DNA module involved in light responsiveness
arahy.Tifrunner.gnm2.ann1.50JJZL.1	1002	1008	part of a conserved DNA module involved in light responsiveness
arahy.Tifrunner.gnm2.ann1.50JJZL.1	923	932	cis-acting regulatory element involved in circadian control
arahy.Tifrunner.gnm2.ann1.50JJZL.1	898	904	part of a conserved DNA module involved in light responsiveness
arahy.Tifrunner.gnm2.ann1.50JJZL.1	858	864	part of a conserved DNA module involved in light responsiveness
arahy.Tifrunner.gnm2.ann1.50JJZL.1	586	595	cis-acting element involved in salicylic acid responsiveness
arahy.Tifrunner.gnm2.ann1.50JJZL.1	560	569	cis-acting element involved in salicylic acid responsiveness
arahy.Tifrunner.gnm2.ann1.50JJZL.1	190	199	cis-acting element involved in defense and stress responsiveness
arahy.Tifrunner.gnm2.ann1.50JJZL.1	144	150	part of a conserved DNA module involved in light responsiveness
arahy.Tifrunner.gnm2.ann1.6KJ02L.1	1667	1673	part of a conserved DNA module involved in light responsiveness
arahy.Tifrunner.gnm2.ann1.6KJ02L.1	1601	1607	part of a conserved DNA module involved in light responsiveness
arahy.Tifrunner.gnm2.ann1.6KJ02L.1	1556	1562	part of a conserved DNA module involved in light responsiveness
arahy.Tifrunner.gnm2.ann1.6KJ02L.1	1537	1543	part of a conserved DNA module involved in light responsiveness
arahy.Tifrunner.gnm2.ann1.6KJ02L.1	1533	1539	part of a conserved DNA module involved in light responsiveness
arahy.Tifrunner.gnm2.ann1.6KJ02L.1	1213	1219	part of a conserved DNA module involved in light responsiveness
arahy.Tifrunner.gnm2.ann1.6KJ02L.1	1149	1155	part of a conserved DNA module involved in light responsiveness
arahy.Tifrunner.gnm2.ann1.6KJ02L.1	982	988	part of a conserved DNA module involved in light responsiveness
arahy.Tifrunner.gnm2.ann1.6KJ02L.1	889	895	light responsive element
arahy.Tifrunner.gnm2.ann1.6KJ02L.1	851	857	light responsive element
arahy.Tifrunner.gnm2.ann1.6KJ02L.1	812	822.5	MYB binding site involved in flavonoid biosynthetic genes regulation
arahy.Tifrunner.gnm2.ann1.6KJ02L.1	788	795	cis-acting element involved in gibberellin-responsiveness
arahy.Tifrunner.gnm2.ann1.6KJ02L.1	738	743	cis-acting regulatory element involved in the MeJA-responsiveness
arahy.Tifrunner.gnm2.ann1.6KJ02L.1	738	743	cis-acting regulatory element involved in the MeJA-responsiveness
arahy.Tifrunner.gnm2.ann1.6KJ02L.1	680	685	cis-acting regulatory element involved in the MeJA-responsiveness
arahy.Tifrunner.gnm2.ann1.6KJ02L.1	680	685	cis-acting regulatory element involved in the MeJA-responsiveness
arahy.Tifrunner.gnm2.ann1.6KJ02L.1	658	664	light responsive element
arahy.Tifrunner.gnm2.ann1.6KJ02L.1	484	490	light responsive element
arahy.Tifrunner.gnm2.ann1.6KJ02L.1	476	485	cis-acting element involved in salicylic acid responsiveness
arahy.Tifrunner.gnm2.ann1.6KJ02L.1	301	308	gibberellin-responsive element
arahy.Tifrunner.gnm2.ann1.6KJ02L.1	1901	1907	auxin-responsive element
arahy.Tifrunner.gnm2.ann1.6NEU1T.1	1782	1788	MYB binding site involved in drought-inducibility
arahy.Tifrunner.gnm2.ann1.6NEU1T.1	1566	1572	cis-acting regulatory element involved in light responsiveness
arahy.Tifrunner.gnm2.ann1.6NEU1T.1	1566	1571	cis-acting element involved in the abscisic acid responsiveness
arahy.Tifrunner.gnm2.ann1.6NEU1T.1	1552	1557	cis-acting element involved in the abscisic acid responsiveness
arahy.Tifrunner.gnm2.ann1.6NEU1T.1	1552	1558	cis-acting regulatory element involved in light responsiveness
arahy.Tifrunner.gnm2.ann1.6NEU1T.1	1521	1530	cis-acting element involved in salicylic acid responsiveness
arahy.Tifrunner.gnm2.ann1.6NEU1T.1	1400	1409	cis-acting element involved in defense and stress responsiveness
arahy.Tifrunner.gnm2.ann1.6NEU1T.1	1354	1360	part of a conserved DNA module involved in light responsiveness
arahy.Tifrunner.gnm2.ann1.6NEU1T.1	1057	1066	cis-acting element involved in salicylic acid responsiveness
arahy.Tifrunner.gnm2.ann1.6NEU1T.1	1035	1041	cis-acting regulatory element related to meristem expression
arahy.Tifrunner.gnm2.ann1.6NEU1T.1	991	1000	cis-acting regulatory element involved in light responsiveness
arahy.Tifrunner.gnm2.ann1.6NEU1T.1	627	633	MYB binding site involved in drought-inducibility
arahy.Tifrunner.gnm2.ann1.6NEU1T.1	485	494	cis-acting element involved in defense and stress responsiveness
arahy.Tifrunner.gnm2.ann1.6NEU1T.1	122	127	cis-acting regulatory element involved in the MeJA-responsiveness
arahy.Tifrunner.gnm2.ann1.6NEU1T.1	122	127	cis-acting regulatory element involved in the MeJA-responsiveness
arahy.Tifrunner.gnm2.ann1.6NEU1T.1	45	50	cis-acting element involved in the abscisic acid responsiveness
arahy.Tifrunner.gnm2.ann1.6NEU1T.1	44	50	cis-acting regulatory element involved in light responsiveness
arahy.Tifrunner.gnm2.ann1.6SHE48.1	1965	1971	part of a conserved DNA module involved in light responsiveness
arahy.Tifrunner.gnm2.ann1.6SHE48.1	1866	1872	part of a conserved DNA module involved in light responsiveness
arahy.Tifrunner.gnm2.ann1.6SHE48.1	1605	1612	cis-regulatory element involved in endosperm expression
arahy.Tifrunner.gnm2.ann1.6SHE48.1	1509	1515	cis-acting regulatory element involved in light responsiveness
arahy.Tifrunner.gnm2.ann1.6SHE48.1	1364	1369	cis-acting element involved in the abscisic acid responsiveness
arahy.Tifrunner.gnm2.ann1.6SHE48.1	1364	1370	cis-acting regulatory element involved in light responsiveness
arahy.Tifrunner.gnm2.ann1.6SHE48.1	1291	1298	cis-regulatory element involved in endosperm expression
arahy.Tifrunner.gnm2.ann1.6SHE48.1	1027	1033	part of a conserved DNA module involved in light responsiveness
arahy.Tifrunner.gnm2.ann1.6SHE48.1	570	576	cis-acting element involved in low-temperature responsiveness
arahy.Tifrunner.gnm2.ann1.6SHE48.1	379	385	part of a conserved DNA module involved in light responsiveness
arahy.Tifrunner.gnm2.ann1.6SHE48.1	149	155	part of a conserved DNA module involved in light responsiveness
arahy.Tifrunner.gnm2.ann1.7Y3SM7.1	1557	1563	part of a conserved DNA module involved in light responsiveness
arahy.Tifrunner.gnm2.ann1.7Y3SM7.1	1184	1190	MYB binding site involved in drought-inducibility
arahy.Tifrunner.gnm2.ann1.7Y3SM7.1	1044	1051	MYB binding site involved in light responsiveness
arahy.Tifrunner.gnm2.ann1.7Y3SM7.1	707	713	light responsive element
arahy.Tifrunner.gnm2.ann1.7Y3SM7.1	706	713	light responsive element
arahy.Tifrunner.gnm2.ann1.7Y3SM7.1	677	686	cis-acting element involved in the abscisic acid responsiveness
arahy.Tifrunner.gnm2.ann1.7Y3SM7.1	647	654	gibberellin-responsive element
arahy.Tifrunner.gnm2.ann1.7Y3SM7.1	604	613	cis-acting element involved in salicylic acid responsiveness
arahy.Tifrunner.gnm2.ann1.7Y3SM7.1	8	18	cis-acting element involved in salicylic acid responsiveness
arahy.Tifrunner.gnm2.ann1.AVE3D2.1	1967	1974	gibberellin-responsive element
arahy.Tifrunner.gnm2.ann1.AVE3D2.1	1762	1767	cis-acting element involved in the abscisic acid responsiveness
arahy.Tifrunner.gnm2.ann1.AVE3D2.1	1761	1767	cis-acting regulatory element involved in light responsiveness
arahy.Tifrunner.gnm2.ann1.AVE3D2.1	1642	1651	cis-acting element involved in the abscisic acid responsiveness
arahy.Tifrunner.gnm2.ann1.AVE3D2.1	1568	1574	cis-acting regulatory element related to meristem expression
arahy.Tifrunner.gnm2.ann1.AVE3D2.1	1375	1384	light responsive element
arahy.Tifrunner.gnm2.ann1.AVE3D2.1	1356	1361	cis-acting regulatory element involved in the MeJA-responsiveness
arahy.Tifrunner.gnm2.ann1.AVE3D2.1	1356	1361	cis-acting regulatory element involved in the MeJA-responsiveness
arahy.Tifrunner.gnm2.ann1.AVE3D2.1	1333	1340	light responsive element
arahy.Tifrunner.gnm2.ann1.AVE3D2.1	1329	1335	MYBHv1 binding site
arahy.Tifrunner.gnm2.ann1.AVE3D2.1	793	799	part of a conserved DNA module involved in light responsiveness
arahy.Tifrunner.gnm2.ann1.AVE3D2.1	789	795	part of a conserved DNA module involved in light responsiveness
arahy.Tifrunner.gnm2.ann1.AVE3D2.1	665	671	light responsive element
arahy.Tifrunner.gnm2.ann1.AVE3D2.1	368	374	light responsive element
arahy.Tifrunner.gnm2.ann1.AVE3D2.1	321	327	cis-acting element involved in low-temperature responsiveness
arahy.Tifrunner.gnm2.ann1.AVE3D2.1	315	321	part of a conserved DNA module involved in light responsiveness
arahy.Tifrunner.gnm2.ann1.AVE3D2.1	292	299	cis-acting regulatory element involved in auxin responsiveness
arahy.Tifrunner.gnm2.ann1.C0SGC9.1	1850	1856	light responsive element
arahy.Tifrunner.gnm2.ann1.C0SGC9.1	1769	1775	cis-acting regulatory element related to meristem expression
arahy.Tifrunner.gnm2.ann1.C0SGC9.1	1396	1402	part of a conserved DNA module involved in light responsiveness
arahy.Tifrunner.gnm2.ann1.C0SGC9.1	1114	1119	cis-acting element involved in the abscisic acid responsiveness
arahy.Tifrunner.gnm2.ann1.C0SGC9.1	1114	1120	cis-acting regulatory element involved in light responsiveness
arahy.Tifrunner.gnm2.ann1.C0SGC9.1	985	991	MYB binding site involved in drought-inducibility
arahy.Tifrunner.gnm2.ann1.C0SGC9.1	963	972	cis-acting element involved in salicylic acid responsiveness
arahy.Tifrunner.gnm2.ann1.C0SGC9.1	919	925	light responsive element
arahy.Tifrunner.gnm2.ann1.C0SGC9.1	918	925	light responsive element
arahy.Tifrunner.gnm2.ann1.C0SGC9.1	863	872	cis-acting element involved in defense and stress responsiveness
arahy.Tifrunner.gnm2.ann1.C0SGC9.1	744	750	part of a conserved DNA module involved in light responsiveness
arahy.Tifrunner.gnm2.ann1.C0SGC9.1	683	692	cis-acting element involved in salicylic acid responsiveness
arahy.Tifrunner.gnm2.ann1.C0SGC9.1	568	574	part of a conserved DNA module involved in light responsiveness
arahy.Tifrunner.gnm2.ann1.C0SGC9.1	433	441	part of a conserved DNA module involved in light responsiveness
arahy.Tifrunner.gnm2.ann1.C0SGC9.1	393	400	light responsive element
arahy.Tifrunner.gnm2.ann1.C0SGC9.1	227	232	cis-acting regulatory element involved in the MeJA-responsiveness
arahy.Tifrunner.gnm2.ann1.C0SGC9.1	227	232	cis-acting regulatory element involved in the MeJA-responsiveness
arahy.Tifrunner.gnm2.ann1.CH1EP2.1	1688	1696	cis-acting regulatory element involved in seed-specific regulation
arahy.Tifrunner.gnm2.ann1.CH1EP2.1	1262	1268	part of a conserved DNA module involved in light responsiveness
arahy.Tifrunner.gnm2.ann1.CH1EP2.1	1210	1215	cis-acting regulatory element involved in the MeJA-responsiveness
arahy.Tifrunner.gnm2.ann1.CH1EP2.1	1210	1215	cis-acting regulatory element involved in the MeJA-responsiveness
arahy.Tifrunner.gnm2.ann1.CH1EP2.1	1189	1196	cis-acting regulatory element involved in auxin responsiveness
arahy.Tifrunner.gnm2.ann1.CH1EP2.1	1030	1037	cis-acting element involved in the abscisic acid responsiveness
arahy.Tifrunner.gnm2.ann1.CH1EP2.1	616	625	wound-responsive element
arahy.Tifrunner.gnm2.ann1.CH1EP2.1	461	467	MYB binding site involved in drought-inducibility
arahy.Tifrunner.gnm2.ann1.CH1EP2.1	403	409	cis-acting regulatory element related to meristem expression
arahy.Tifrunner.gnm2.ann1.CH1EP2.1	59	65	MYBHv1 binding site
arahy.Tifrunner.gnm2.ann1.CH1EP2.1	96	102	auxin-responsive element
arahy.Tifrunner.gnm2.ann1.EPT56A.1	1969	1976	gibberellin-responsive element
arahy.Tifrunner.gnm2.ann1.EPT56A.1	1542	1547	cis-acting element involved in the abscisic acid responsiveness
arahy.Tifrunner.gnm2.ann1.EPT56A.1	1541	1547	cis-acting regulatory element involved in light responsiveness
arahy.Tifrunner.gnm2.ann1.EPT56A.1	1213	1219	light responsive element
arahy.Tifrunner.gnm2.ann1.EPT56A.1	1126	1133	MYB binding site involved in light responsiveness
arahy.Tifrunner.gnm2.ann1.EPT56A.1	882	888	part of a conserved DNA module involved in light responsiveness
arahy.Tifrunner.gnm2.ann1.EPT56A.1	605	611	part of a conserved DNA module involved in light responsiveness
arahy.Tifrunner.gnm2.ann1.EPT56A.1	236	245	cis-acting element involved in defense and stress responsiveness
arahy.Tifrunner.gnm2.ann1.F1TUFL.1	1930	1937	gibberellin-responsive element
arahy.Tifrunner.gnm2.ann1.F1TUFL.1	1719	1725	cis-acting regulatory element involved in light responsiveness
arahy.Tifrunner.gnm2.ann1.F1TUFL.1	1599	1606	gibberellin-responsive element
arahy.Tifrunner.gnm2.ann1.F1TUFL.1	1387	1393	part of a conserved DNA module involved in light responsiveness
arahy.Tifrunner.gnm2.ann1.F1TUFL.1	1368	1373	cis-acting regulatory element involved in the MeJA-responsiveness
arahy.Tifrunner.gnm2.ann1.F1TUFL.1	1368	1373	cis-acting regulatory element involved in the MeJA-responsiveness
arahy.Tifrunner.gnm2.ann1.F1TUFL.1	1291	1297	part of a conserved DNA module involved in light responsiveness
arahy.Tifrunner.gnm2.ann1.F1TUFL.1	1196	1202	part of a conserved DNA module involved in light responsiveness
arahy.Tifrunner.gnm2.ann1.F1TUFL.1	1192	1198	part of a conserved DNA module involved in light responsiveness
arahy.Tifrunner.gnm2.ann1.F1TUFL.1	1075	1081	part of a conserved DNA module involved in light responsiveness
arahy.Tifrunner.gnm2.ann1.F1TUFL.1	877	883	part of a conserved DNA module involved in light responsiveness
arahy.Tifrunner.gnm2.ann1.F1TUFL.1	656	661	cis-acting element involved in the abscisic acid responsiveness
arahy.Tifrunner.gnm2.ann1.F1TUFL.1	655	661	cis-acting regulatory element involved in light responsiveness
arahy.Tifrunner.gnm2.ann1.F1TUFL.1	599	605	MYBHv1 binding site
arahy.Tifrunner.gnm2.ann1.F1TUFL.1	567	572	cis-acting regulatory element involved in the MeJA-responsiveness
arahy.Tifrunner.gnm2.ann1.F1TUFL.1	567	572	cis-acting regulatory element involved in the MeJA-responsiveness
arahy.Tifrunner.gnm2.ann1.F1TUFL.1	565	570	cis-acting element involved in the abscisic acid responsiveness
arahy.Tifrunner.gnm2.ann1.F1TUFL.1	565	571	cis-acting regulatory element involved in light responsiveness
arahy.Tifrunner.gnm2.ann1.F1TUFL.1	357	363	MYB binding site involved in drought-inducibility
arahy.Tifrunner.gnm2.ann1.F1TUFL.1	330	335	cis-acting element involved in the abscisic acid responsiveness
arahy.Tifrunner.gnm2.ann1.F1TUFL.1	330	336	cis-acting regulatory element involved in light responsiveness
arahy.Tifrunner.gnm2.ann1.F1TUFL.1	204	211	cis-acting element involved in gibberellin-responsiveness
arahy.Tifrunner.gnm2.ann1.F1TUFL.1	604	610	auxin-responsive element
arahy.Tifrunner.gnm2.ann1.F1TUFL.1	493	499	auxin-responsive element
arahy.Tifrunner.gnm2.ann1.F1TUFL.1	369	375	auxin-responsive element
arahy.Tifrunner.gnm2.ann1.FBS0NK.1	1660	1667	cis-acting regulatory element involved in auxin responsiveness
arahy.Tifrunner.gnm2.ann1.FBS0NK.1	1493	1503	light responsive element
arahy.Tifrunner.gnm2.ann1.FBS0NK.1	989	995	light responsive element
arahy.Tifrunner.gnm2.ann1.FBS0NK.1	909	916	cis-acting element involved in gibberellin-responsiveness
arahy.Tifrunner.gnm2.ann1.FBS0NK.1	854	860	part of a conserved DNA module involved in light responsiveness
arahy.Tifrunner.gnm2.ann1.FBS0NK.1	822	828	part of a conserved DNA module involved in light responsiveness
arahy.Tifrunner.gnm2.ann1.FBS0NK.1	552	561	cis-acting element involved in salicylic acid responsiveness
arahy.Tifrunner.gnm2.ann1.FBS0NK.1	2	13	MYB binding site involved in flavonoid biosynthetic genes regulation
arahy.Tifrunner.gnm2.ann1.FBS0NK.1	954	960	auxin-responsive element
arahy.Tifrunner.gnm2.ann1.FJ610L.2	1933	1940	MYB binding site involved in light responsiveness
arahy.Tifrunner.gnm2.ann1.FJ610L.2	1927	1936	cis-acting regulatory element involved in light responsiveness
arahy.Tifrunner.gnm2.ann1.FJ610L.2	1819	1824	cis-acting element involved in the abscisic acid responsiveness
arahy.Tifrunner.gnm2.ann1.FJ610L.2	1818	1824	cis-acting regulatory element involved in light responsiveness
arahy.Tifrunner.gnm2.ann1.FJ610L.2	1818	1824	cis-acting element involved in the abscisic acid responsiveness
arahy.Tifrunner.gnm2.ann1.FJ610L.2	1818	1824	cis-acting regulatory element involved in light responsiveness
arahy.Tifrunner.gnm2.ann1.FJ610L.2	1817	1826	cis-acting regulatory element involved in light responsiveness
arahy.Tifrunner.gnm2.ann1.FJ610L.2	1816	1825	cis-acting element involved in the abscisic acid responsiveness
arahy.Tifrunner.gnm2.ann1.FJ610L.2	1812	1818	cis-acting element involved in low-temperature responsiveness
arahy.Tifrunner.gnm2.ann1.FJ610L.2	1797	1802	cis-acting regulatory element involved in the MeJA-responsiveness
arahy.Tifrunner.gnm2.ann1.FJ610L.2	1797	1802	cis-acting regulatory element involved in the MeJA-responsiveness
arahy.Tifrunner.gnm2.ann1.FJ610L.2	1746	1752	part of a conserved DNA module involved in light responsiveness
arahy.Tifrunner.gnm2.ann1.FJ610L.2	1471	1477	part of a conserved DNA module involved in light responsiveness
arahy.Tifrunner.gnm2.ann1.FJ610L.2	1448	1455	MYB binding site involved in light responsiveness
arahy.Tifrunner.gnm2.ann1.FJ610L.2	1424	1430	part of a conserved DNA module involved in light responsiveness
arahy.Tifrunner.gnm2.ann1.FJ610L.2	1400	1406	part of a conserved DNA module involved in light responsiveness
arahy.Tifrunner.gnm2.ann1.FJ610L.2	1364	1371	gibberellin-responsive element
arahy.Tifrunner.gnm2.ann1.FJ610L.2	1278	1283	cis-acting regulatory element involved in the MeJA-responsiveness
arahy.Tifrunner.gnm2.ann1.FJ610L.2	1278	1283	cis-acting regulatory element involved in the MeJA-responsiveness
arahy.Tifrunner.gnm2.ann1.FJ610L.2	1263	1269	light responsive element
arahy.Tifrunner.gnm2.ann1.FJ610L.2	1174	1181	gibberellin-responsive element
arahy.Tifrunner.gnm2.ann1.FJ610L.2	1099	1105	part of a conserved DNA module involved in light responsiveness
arahy.Tifrunner.gnm2.ann1.FJ610L.2	995	1000	cis-acting element involved in the abscisic acid responsiveness
arahy.Tifrunner.gnm2.ann1.FJ610L.2	994	1000	cis-acting regulatory element involved in light responsiveness
arahy.Tifrunner.gnm2.ann1.FJ610L.2	994	1000	cis-acting element involved in the abscisic acid responsiveness
arahy.Tifrunner.gnm2.ann1.FJ610L.2	994	1000	cis-acting regulatory element involved in light responsiveness
arahy.Tifrunner.gnm2.ann1.FJ610L.2	968	974	part of a conserved DNA module involved in light responsiveness
arahy.Tifrunner.gnm2.ann1.FJ610L.2	879	885	part of a conserved DNA module involved in light responsiveness
arahy.Tifrunner.gnm2.ann1.FJ610L.2	829	835	part of a conserved DNA module involved in light responsiveness
arahy.Tifrunner.gnm2.ann1.FJ610L.2	716	722	part of a conserved DNA module involved in light responsiveness
arahy.Tifrunner.gnm2.ann1.FJ610L.2	506	511	cis-acting element involved in the abscisic acid responsiveness
arahy.Tifrunner.gnm2.ann1.FJ610L.2	505	511	cis-acting regulatory element involved in light responsiveness
arahy.Tifrunner.gnm2.ann1.FJ610L.2	394	400	part of a conserved DNA module involved in light responsiveness
arahy.Tifrunner.gnm2.ann1.FJ610L.2	305	311	part of a conserved DNA module involved in light responsiveness
arahy.Tifrunner.gnm2.ann1.FJ610L.2	284	290	part of a conserved DNA module involved in light responsiveness
arahy.Tifrunner.gnm2.ann1.FJ610L.2	120	126	part of a conserved DNA module involved in light responsiveness
arahy.Tifrunner.gnm2.ann1.FJ610L.2	16	23	light responsive element
arahy.Tifrunner.gnm2.ann1.FK6HB9.1	1815	1824	cis-acting element involved in salicylic acid responsiveness
arahy.Tifrunner.gnm2.ann1.FK6HB9.1	1700	1706	part of a conserved DNA module involved in light responsiveness
arahy.Tifrunner.gnm2.ann1.FK6HB9.1	1594	1600	light responsive element
arahy.Tifrunner.gnm2.ann1.FK6HB9.1	1551	1557	light responsive element
arahy.Tifrunner.gnm2.ann1.FK6HB9.1	1393	1399	part of a conserved DNA module involved in light responsiveness
arahy.Tifrunner.gnm2.ann1.FK6HB9.1	1321	1327	part of a conserved DNA module involved in light responsiveness
arahy.Tifrunner.gnm2.ann1.FK6HB9.1	1255	1261	part of a conserved DNA module involved in light responsiveness
arahy.Tifrunner.gnm2.ann1.FK6HB9.1	1212	1218	part of a conserved DNA module involved in light responsiveness
arahy.Tifrunner.gnm2.ann1.FK6HB9.1	745	751	part of a conserved DNA module involved in light responsiveness
arahy.Tifrunner.gnm2.ann1.FK6HB9.1	613	619	light responsive element
arahy.Tifrunner.gnm2.ann1.FK6HB9.1	436	442	part of a conserved DNA module involved in light responsiveness
arahy.Tifrunner.gnm2.ann1.FK6HB9.1	393	399	part of a conserved DNA module involved in light responsiveness
arahy.Tifrunner.gnm2.ann1.FK6HB9.1	321	327	part of a conserved DNA module involved in light responsiveness
arahy.Tifrunner.gnm2.ann1.FK6HB9.1	73	79	cis-acting regulatory element involved in light responsiveness
arahy.Tifrunner.gnm2.ann1.FK6HB9.1	73	78	cis-acting element involved in the abscisic acid responsiveness
arahy.Tifrunner.gnm2.ann1.GK9ADN.1	1976	1982	part of a conserved DNA module involved in light responsiveness
arahy.Tifrunner.gnm2.ann1.GK9ADN.1	1547	1556	cis-acting regulatory element involved in circadian control
arahy.Tifrunner.gnm2.ann1.GK9ADN.1	1353	1359	cis-acting regulatory element related to meristem expression
arahy.Tifrunner.gnm2.ann1.GK9ADN.1	1204	1210	part of a conserved DNA module involved in light responsiveness
arahy.Tifrunner.gnm2.ann1.GK9ADN.1	1137	1142	cis-acting element involved in the abscisic acid responsiveness
arahy.Tifrunner.gnm2.ann1.GK9ADN.1	1136	1142	cis-acting regulatory element involved in light responsiveness
arahy.Tifrunner.gnm2.ann1.GK9ADN.1	917	923	cis-acting regulatory element involved in light responsiveness
arahy.Tifrunner.gnm2.ann1.GK9ADN.1	917	922	cis-acting element involved in the abscisic acid responsiveness
arahy.Tifrunner.gnm2.ann1.GK9ADN.1	775	780	cis-acting element involved in the abscisic acid responsiveness
arahy.Tifrunner.gnm2.ann1.GK9ADN.1	774	780	cis-acting regulatory element involved in light responsiveness
arahy.Tifrunner.gnm2.ann1.GK9ADN.1	765	771	cis-acting element involved in low-temperature responsiveness
arahy.Tifrunner.gnm2.ann1.GK9ADN.1	647	656	cis-acting element involved in defense and stress responsiveness
arahy.Tifrunner.gnm2.ann1.GK9ADN.1	617	624	light responsive element
arahy.Tifrunner.gnm2.ann1.GK9ADN.1	494	500	part of a conserved DNA module involved in light responsiveness
arahy.Tifrunner.gnm2.ann1.GK9ADN.1	313	318	cis-acting element involved in the abscisic acid responsiveness
arahy.Tifrunner.gnm2.ann1.GK9ADN.1	312	318	cis-acting regulatory element involved in light responsiveness
arahy.Tifrunner.gnm2.ann1.GK9ADN.1	311	316	cis-acting regulatory element involved in the MeJA-responsiveness
arahy.Tifrunner.gnm2.ann1.GK9ADN.1	311	316	cis-acting regulatory element involved in the MeJA-responsiveness
arahy.Tifrunner.gnm2.ann1.GK9ADN.1	290	299	cis-acting regulatory element involved in circadian control
arahy.Tifrunner.gnm2.ann1.GK9ADN.1	266	275	cis-acting regulatory element involved in circadian control
arahy.Tifrunner.gnm2.ann1.GQW4DS.1	1911	1920	cis-acting element involved in salicylic acid responsiveness
arahy.Tifrunner.gnm2.ann1.GQW4DS.1	1547	1554	MYB binding site involved in light responsiveness
arahy.Tifrunner.gnm2.ann1.GQW4DS.1	1390	1399	cis-acting element involved in defense and stress responsiveness
arahy.Tifrunner.gnm2.ann1.GQW4DS.1	1344	1350	part of a conserved DNA module involved in light responsiveness
arahy.Tifrunner.gnm2.ann1.GQW4DS.1	1245	1251	part of a conserved DNA module involved in light responsiveness
arahy.Tifrunner.gnm2.ann1.GQW4DS.1	1155	1160	cis-acting regulatory element involved in the MeJA-responsiveness
arahy.Tifrunner.gnm2.ann1.GQW4DS.1	1155	1160	cis-acting regulatory element involved in the MeJA-responsiveness
arahy.Tifrunner.gnm2.ann1.GQW4DS.1	1113	1118	cis-acting element involved in the abscisic acid responsiveness
arahy.Tifrunner.gnm2.ann1.GQW4DS.1	1112	1118	cis-acting regulatory element involved in light responsiveness
arahy.Tifrunner.gnm2.ann1.GQW4DS.1	1112	1118	cis-acting element involved in the abscisic acid responsiveness
arahy.Tifrunner.gnm2.ann1.GQW4DS.1	1112	1118	cis-acting regulatory element involved in light responsiveness
arahy.Tifrunner.gnm2.ann1.GQW4DS.1	1111	1119	cis-acting regulatory element involved in light responsiveness
arahy.Tifrunner.gnm2.ann1.GQW4DS.1	1060	1069	cis-acting element involved in salicylic acid responsiveness
arahy.Tifrunner.gnm2.ann1.GQW4DS.1	1009	1014	cis-acting regulatory element involved in the MeJA-responsiveness
arahy.Tifrunner.gnm2.ann1.GQW4DS.1	1009	1014	cis-acting regulatory element involved in the MeJA-responsiveness
arahy.Tifrunner.gnm2.ann1.GQW4DS.1	798	805	cis-regulatory element involved in endosperm expression
arahy.Tifrunner.gnm2.ann1.GQW4DS.1	669	674	cis-acting regulatory element involved in the MeJA-responsiveness
arahy.Tifrunner.gnm2.ann1.GQW4DS.1	669	674	cis-acting regulatory element involved in the MeJA-responsiveness
arahy.Tifrunner.gnm2.ann1.GQW4DS.1	326	332	cis-acting regulatory element involved in light responsiveness
arahy.Tifrunner.gnm2.ann1.GQW4DS.1	315	321	cis-acting regulatory element involved in light responsiveness
arahy.Tifrunner.gnm2.ann1.GQW4DS.1	298	304	cis-acting regulatory element involved in light responsiveness
arahy.Tifrunner.gnm2.ann1.GQW4DS.1	13	19	part of a conserved DNA module involved in light responsiveness
arahy.Tifrunner.gnm2.ann1.GQW4DS.1	572	578	auxin-responsive element
arahy.Tifrunner.gnm2.ann1.GQW4DS.1	270	276	auxin-responsive element
arahy.Tifrunner.gnm2.ann1.H0C812.1	1789	1798	cis-acting element involved in salicylic acid responsiveness
arahy.Tifrunner.gnm2.ann1.H0C812.1	1675	1681	part of a conserved DNA module involved in light responsiveness
arahy.Tifrunner.gnm2.ann1.H0C812.1	1657	1663	part of a conserved DNA module involved in light responsiveness
arahy.Tifrunner.gnm2.ann1.H0C812.1	1503	1509	light responsive element
arahy.Tifrunner.gnm2.ann1.H0C812.1	1434	1440	cis-acting element involved in low-temperature responsiveness
arahy.Tifrunner.gnm2.ann1.H0C812.1	1283	1292	part of a conserved DNA module involved in light responsiveness
arahy.Tifrunner.gnm2.ann1.H0C812.1	1202	1208	part of a conserved DNA module involved in light responsiveness
arahy.Tifrunner.gnm2.ann1.H0C812.1	721	727	part of a conserved DNA module involved in light responsiveness
arahy.Tifrunner.gnm2.ann1.H0C812.1	702	711	part of a conserved DNA module involved in light responsiveness
arahy.Tifrunner.gnm2.ann1.H0C812.1	684	690	part of a conserved DNA module involved in light responsiveness
arahy.Tifrunner.gnm2.ann1.H0C812.1	673	679	part of a conserved DNA module involved in light responsiveness
arahy.Tifrunner.gnm2.ann1.H0C812.1	549	555	light responsive element
arahy.Tifrunner.gnm2.ann1.H0C812.1	358	364	part of a conserved DNA module involved in light responsiveness
arahy.Tifrunner.gnm2.ann1.H0C812.1	206	212	part of a conserved DNA module involved in light responsiveness
arahy.Tifrunner.gnm2.ann1.HQ8G2J.1	1879	1885	part of a conserved DNA module involved in light responsiveness
arahy.Tifrunner.gnm2.ann1.HQ8G2J.1	1875	1881	part of a conserved DNA module involved in light responsiveness
arahy.Tifrunner.gnm2.ann1.HQ8G2J.1	1871	1877	part of a conserved DNA module involved in light responsiveness
arahy.Tifrunner.gnm2.ann1.HQ8G2J.1	1576	1582	part of a conserved DNA module involved in light responsiveness
arahy.Tifrunner.gnm2.ann1.HQ8G2J.1	1544	1549	cis-acting element involved in the abscisic acid responsiveness
arahy.Tifrunner.gnm2.ann1.HQ8G2J.1	1543	1549	cis-acting element involved in the abscisic acid responsiveness
arahy.Tifrunner.gnm2.ann1.HQ8G2J.1	1543	1549	cis-acting regulatory element involved in light responsiveness
arahy.Tifrunner.gnm2.ann1.HQ8G2J.1	1543	1549	cis-acting regulatory element involved in light responsiveness
arahy.Tifrunner.gnm2.ann1.HQ8G2J.1	1541	1550	cis-acting element involved in the abscisic acid responsiveness
arahy.Tifrunner.gnm2.ann1.HQ8G2J.1	1510	1515	cis-acting element involved in the abscisic acid responsiveness
arahy.Tifrunner.gnm2.ann1.HQ8G2J.1	1509	1515	cis-acting regulatory element involved in light responsiveness
arahy.Tifrunner.gnm2.ann1.HQ8G2J.1	1319	1326	cis-regulatory element involved in endosperm expression
arahy.Tifrunner.gnm2.ann1.HQ8G2J.1	1299	1305	part of a conserved DNA module involved in light responsiveness
arahy.Tifrunner.gnm2.ann1.HQ8G2J.1	1262	1268	part of a conserved DNA module involved in light responsiveness
arahy.Tifrunner.gnm2.ann1.HQ8G2J.1	1217	1223	part of a conserved DNA module involved in light responsiveness
arahy.Tifrunner.gnm2.ann1.HQ8G2J.1	1054	1060	MYB binding site involved in drought-inducibility
arahy.Tifrunner.gnm2.ann1.HQ8G2J.1	1040	1047	cis-acting element involved in gibberellin-responsiveness
arahy.Tifrunner.gnm2.ann1.HQ8G2J.1	863	869	MYB binding site involved in drought-inducibility
arahy.Tifrunner.gnm2.ann1.HQ8G2J.1	857	866	cis-acting element involved in defense and stress responsiveness
arahy.Tifrunner.gnm2.ann1.HQ8G2J.1	707	712	cis-acting element involved in the abscisic acid responsiveness
arahy.Tifrunner.gnm2.ann1.HQ8G2J.1	707	713	cis-acting regulatory element involved in light responsiveness
arahy.Tifrunner.gnm2.ann1.HQ8G2J.1	606	613	cis-acting element involved in gibberellin-responsiveness
arahy.Tifrunner.gnm2.ann1.HQ8G2J.1	452	461	cis-acting element involved in defense and stress responsiveness
arahy.Tifrunner.gnm2.ann1.HQ8G2J.1	258	264	cis-acting regulatory element related to meristem expression
arahy.Tifrunner.gnm2.ann1.HQ8G2J.1	131	137	MYB binding site involved in drought-inducibility
arahy.Tifrunner.gnm2.ann1.HQ8G2J.1	22	28	part of a conserved DNA module involved in light responsiveness
arahy.Tifrunner.gnm2.ann1.I1ZCNY.1	1665	1670	cis-acting regulatory element involved in the MeJA-responsiveness
arahy.Tifrunner.gnm2.ann1.I1ZCNY.1	1665	1670	cis-acting regulatory element involved in the MeJA-responsiveness
arahy.Tifrunner.gnm2.ann1.I1ZCNY.1	1427	1436	cis-acting element involved in defense and stress responsiveness
arahy.Tifrunner.gnm2.ann1.I1ZCNY.1	1381	1387	part of a conserved DNA module involved in light responsiveness
arahy.Tifrunner.gnm2.ann1.I1ZCNY.1	1282	1288	part of a conserved DNA module involved in light responsiveness
arahy.Tifrunner.gnm2.ann1.I1ZCNY.1	1148	1157	cis-acting element involved in salicylic acid responsiveness
arahy.Tifrunner.gnm2.ann1.I1ZCNY.1	945	951	cis-acting regulatory element involved in light responsiveness
arahy.Tifrunner.gnm2.ann1.I1ZCNY.1	945	950	cis-acting element involved in the abscisic acid responsiveness
arahy.Tifrunner.gnm2.ann1.I1ZCNY.1	840	846	cis-acting regulatory element involved in light responsiveness
arahy.Tifrunner.gnm2.ann1.I1ZCNY.1	840	845	cis-acting element involved in the abscisic acid responsiveness
arahy.Tifrunner.gnm2.ann1.I1ZCNY.1	573	579	cis-acting regulatory element involved in light responsiveness
arahy.Tifrunner.gnm2.ann1.I1ZCNY.1	573	578	cis-acting element involved in the abscisic acid responsiveness
arahy.Tifrunner.gnm2.ann1.I1ZCNY.1	133	139	part of a conserved DNA module involved in light responsiveness
arahy.Tifrunner.gnm2.ann1.I1ZCNY.1	118	127	cis-acting element involved in salicylic acid responsiveness
arahy.Tifrunner.gnm2.ann1.IN1Z0G.1	1805	1811	MYB binding site involved in drought-inducibility
arahy.Tifrunner.gnm2.ann1.IN1Z0G.1	1800	1805	cis-acting regulatory element involved in the MeJA-responsiveness
arahy.Tifrunner.gnm2.ann1.IN1Z0G.1	1800	1805	cis-acting regulatory element involved in the MeJA-responsiveness
arahy.Tifrunner.gnm2.ann1.IN1Z0G.1	1654	1659	cis-acting regulatory element involved in the MeJA-responsiveness
arahy.Tifrunner.gnm2.ann1.IN1Z0G.1	1654	1659	cis-acting regulatory element involved in the MeJA-responsiveness
arahy.Tifrunner.gnm2.ann1.IN1Z0G.1	1536	1542	part of a conserved DNA module involved in light responsiveness
arahy.Tifrunner.gnm2.ann1.IN1Z0G.1	1453	1462	cis-acting element involved in defense and stress responsiveness
arahy.Tifrunner.gnm2.ann1.IN1Z0G.1	1250	1256	cis-acting regulatory element involved in light responsiveness
arahy.Tifrunner.gnm2.ann1.IN1Z0G.1	1250	1255	cis-acting element involved in the abscisic acid responsiveness
arahy.Tifrunner.gnm2.ann1.IN1Z0G.1	937	943	cis-acting regulatory element involved in light responsiveness
arahy.Tifrunner.gnm2.ann1.IN1Z0G.1	808	813	cis-acting regulatory element involved in the MeJA-responsiveness
arahy.Tifrunner.gnm2.ann1.IN1Z0G.1	808	813	cis-acting regulatory element involved in the MeJA-responsiveness
arahy.Tifrunner.gnm2.ann1.IN1Z0G.1	797	803	enhancer-like element involved in anoxic specific inducibility
arahy.Tifrunner.gnm2.ann1.IN1Z0G.1	592	598	enhancer-like element involved in anoxic specific inducibility
arahy.Tifrunner.gnm2.ann1.IN1Z0G.1	120	126	cis-acting element involved in low-temperature responsiveness
arahy.Tifrunner.gnm2.ann1.IN1Z0G.1	4	10	cis-acting element involved in low-temperature responsiveness
arahy.Tifrunner.gnm2.ann1.IN1Z0G.1	1693	1699	auxin-responsive element
arahy.Tifrunner.gnm2.ann1.JGC745.1	1822	1828	MYBHv1 binding site
arahy.Tifrunner.gnm2.ann1.JGC745.1	1399	1405	light responsive element
arahy.Tifrunner.gnm2.ann1.JGC745.1	1396	1403	MYB binding site involved in light responsiveness
arahy.Tifrunner.gnm2.ann1.JGC745.1	1162	1168	part of a conserved DNA module involved in light responsiveness
arahy.Tifrunner.gnm2.ann1.JGC745.1	901	908	cis-regulatory element involved in endosperm expression
arahy.Tifrunner.gnm2.ann1.JGC745.1	835	841	light responsive element
arahy.Tifrunner.gnm2.ann1.JGC745.1	834	841	light responsive element
arahy.Tifrunner.gnm2.ann1.JGC745.1	807	813	part of a conserved DNA module involved in light responsiveness
arahy.Tifrunner.gnm2.ann1.JGC745.1	473	479	MYB binding site involved in drought-inducibility
arahy.Tifrunner.gnm2.ann1.JGC745.1	138	147	cis-acting regulatory element involved in circadian control
arahy.Tifrunner.gnm2.ann1.JGC745.1	127	133	part of a conserved DNA module involved in light responsiveness
arahy.Tifrunner.gnm2.ann1.JGC745.1	56	62	part of a conserved DNA module involved in light responsiveness
arahy.Tifrunner.gnm2.ann1.K28R5D.1	1970	1976	MYBHv1 binding site
arahy.Tifrunner.gnm2.ann1.K28R5D.1	1602	1609	cis-regulatory element involved in endosperm expression
arahy.Tifrunner.gnm2.ann1.K28R5D.1	1538	1544	light responsive element
arahy.Tifrunner.gnm2.ann1.K28R5D.1	1537	1544	light responsive element
arahy.Tifrunner.gnm2.ann1.K28R5D.1	1510	1516	part of a conserved DNA module involved in light responsiveness
arahy.Tifrunner.gnm2.ann1.K28R5D.1	1279	1288	cis-acting element involved in salicylic acid responsiveness
arahy.Tifrunner.gnm2.ann1.K28R5D.1	1172	1178	part of a conserved DNA module involved in light responsiveness
arahy.Tifrunner.gnm2.ann1.K28R5D.1	1132	1138	part of a conserved DNA module involved in light responsiveness
arahy.Tifrunner.gnm2.ann1.K28R5D.1	717	723	light responsive element
arahy.Tifrunner.gnm2.ann1.K28R5D.1	611	617	part of a conserved DNA module involved in light responsiveness
arahy.Tifrunner.gnm2.ann1.K28R5D.1	392	398	part of a conserved DNA module involved in light responsiveness
arahy.Tifrunner.gnm2.ann1.K28R5D.1	382	388	part of a conserved DNA module involved in light responsiveness
arahy.Tifrunner.gnm2.ann1.K28R5D.1	375	381	part of a conserved DNA module involved in light responsiveness
arahy.Tifrunner.gnm2.ann1.K28R5D.1	332	338	part of a conserved DNA module involved in light responsiveness
arahy.Tifrunner.gnm2.ann1.K28R5D.1	319	326	MYB binding site involved in light responsiveness
arahy.Tifrunner.gnm2.ann1.K28R5D.1	277	284	light responsive element
arahy.Tifrunner.gnm2.ann1.K28R5D.1	148	154	cis-acting regulatory element related to meristem expression
arahy.Tifrunner.gnm2.ann1.K28R5D.1	84	89	cis-acting regulatory element involved in the MeJA-responsiveness
arahy.Tifrunner.gnm2.ann1.K28R5D.1	84	89	cis-acting regulatory element involved in the MeJA-responsiveness
arahy.Tifrunner.gnm2.ann1.M8TEG5.1	1805	1811	MYB binding site involved in drought-inducibility
arahy.Tifrunner.gnm2.ann1.M8TEG5.1	1800	1805	cis-acting regulatory element involved in the MeJA-responsiveness
arahy.Tifrunner.gnm2.ann1.M8TEG5.1	1800	1805	cis-acting regulatory element involved in the MeJA-responsiveness
arahy.Tifrunner.gnm2.ann1.M8TEG5.1	1673	1679	cis-acting regulatory element involved in light responsiveness
arahy.Tifrunner.gnm2.ann1.M8TEG5.1	1673	1678	cis-acting element involved in the abscisic acid responsiveness
arahy.Tifrunner.gnm2.ann1.M8TEG5.1	1462	1471	cis-acting element involved in defense and stress responsiveness
arahy.Tifrunner.gnm2.ann1.M8TEG5.1	1416	1422	part of a conserved DNA module involved in light responsiveness
arahy.Tifrunner.gnm2.ann1.M8TEG5.1	1271	1277	cis-acting element involved in low-temperature responsiveness
arahy.Tifrunner.gnm2.ann1.M8TEG5.1	1116	1122	part of a conserved DNA module involved in light responsiveness
arahy.Tifrunner.gnm2.ann1.M8TEG5.1	933	939	part of a conserved DNA module involved in light responsiveness
arahy.Tifrunner.gnm2.ann1.M8TEG5.1	758	767	cis-acting element involved in salicylic acid responsiveness
arahy.Tifrunner.gnm2.ann1.M8TEG5.1	618	626	cis-acting regulatory element involved in light responsiveness
arahy.Tifrunner.gnm2.ann1.M8TEG5.1	618	623	cis-acting element involved in the abscisic acid responsiveness
arahy.Tifrunner.gnm2.ann1.M8TEG5.1	618	624	cis-acting regulatory element involved in light responsiveness
arahy.Tifrunner.gnm2.ann1.M8TEG5.1	541	546	cis-acting element involved in the abscisic acid responsiveness
arahy.Tifrunner.gnm2.ann1.M8TEG5.1	540	546	cis-acting regulatory element involved in light responsiveness
arahy.Tifrunner.gnm2.ann1.M8TEG5.1	419	426	MYB binding site involved in light responsiveness
arahy.Tifrunner.gnm2.ann1.M8TEG5.1	353	359	cis-acting regulatory element involved in light responsiveness
arahy.Tifrunner.gnm2.ann1.M8TEG5.1	170	176	cis-acting element involved in low-temperature responsiveness
arahy.Tifrunner.gnm2.ann1.M8TEG5.1	1600	1606	auxin-responsive element
arahy.Tifrunner.gnm2.ann1.M8TEG5.1	394	400	auxin-responsive element
arahy.Tifrunner.gnm2.ann1.PW1K78.1	1984	1990	part of a conserved DNA module involved in light responsiveness
arahy.Tifrunner.gnm2.ann1.PW1K78.1	1766	1773	MYB binding site involved in light responsiveness
arahy.Tifrunner.gnm2.ann1.PW1K78.1	1707	1714	gibberellin-responsive element
arahy.Tifrunner.gnm2.ann1.PW1K78.1	1702	1708	light responsive element
arahy.Tifrunner.gnm2.ann1.PW1K78.1	1671	1680	cis-acting element involved in salicylic acid responsiveness
arahy.Tifrunner.gnm2.ann1.PW1K78.1	1650	1660	cis-acting element involved in salicylic acid responsiveness
arahy.Tifrunner.gnm2.ann1.PW1K78.1	1589	1595	MYB binding site involved in drought-inducibility
arahy.Tifrunner.gnm2.ann1.PW1K78.1	1459	1465	light responsive element
arahy.Tifrunner.gnm2.ann1.PW1K78.1	870	875	cis-acting regulatory element involved in the MeJA-responsiveness
arahy.Tifrunner.gnm2.ann1.PW1K78.1	870	875	cis-acting regulatory element involved in the MeJA-responsiveness
arahy.Tifrunner.gnm2.ann1.PW1K78.1	832	838	light responsive element
arahy.Tifrunner.gnm2.ann1.PW1K78.1	715	721	MYB binding site involved in drought-inducibility
arahy.Tifrunner.gnm2.ann1.PW1K78.1	464	470	part of a conserved DNA module involved in light responsiveness
arahy.Tifrunner.gnm2.ann1.PW1K78.1	104	110	cis-acting element involved in low-temperature responsiveness
arahy.Tifrunner.gnm2.ann1.PW1K78.1	901	907	auxin-responsive element
arahy.Tifrunner.gnm2.ann1.PW1K78.1	682	688	auxin-responsive element
arahy.Tifrunner.gnm2.ann1.PX38R1.1	1805	1811	MYB binding site involved in drought-inducibility
arahy.Tifrunner.gnm2.ann1.PX38R1.1	1717	1723	cis-acting regulatory element involved in light responsiveness
arahy.Tifrunner.gnm2.ann1.PX38R1.1	1704	1709	cis-acting element involved in the abscisic acid responsiveness
arahy.Tifrunner.gnm2.ann1.PX38R1.1	1704	1710	cis-acting regulatory element involved in light responsiveness
arahy.Tifrunner.gnm2.ann1.PX38R1.1	1630	1636	part of a conserved DNA module involved in light responsiveness
arahy.Tifrunner.gnm2.ann1.PX38R1.1	1559	1564	cis-acting element involved in the abscisic acid responsiveness
arahy.Tifrunner.gnm2.ann1.PX38R1.1	1558	1564	cis-acting regulatory element involved in light responsiveness
arahy.Tifrunner.gnm2.ann1.PX38R1.1	1517	1523	part of a conserved DNA module involved in light responsiveness
arahy.Tifrunner.gnm2.ann1.PX38R1.1	1494	1500	part of a conserved DNA module involved in light responsiveness
arahy.Tifrunner.gnm2.ann1.PX38R1.1	1381	1392	MYB binding site involved in flavonoid biosynthetic genes regulation
arahy.Tifrunner.gnm2.ann1.PX38R1.1	1189	1198	cis-acting element involved in salicylic acid responsiveness
arahy.Tifrunner.gnm2.ann1.PX38R1.1	1043	1049	part of a conserved DNA module involved in light responsiveness
arahy.Tifrunner.gnm2.ann1.PX38R1.1	1026	1032	cis-acting element involved in low-temperature responsiveness
arahy.Tifrunner.gnm2.ann1.PX38R1.1	874	883	cis-acting element involved in salicylic acid responsiveness
arahy.Tifrunner.gnm2.ann1.PX38R1.1	676	682	part of a conserved DNA module involved in light responsiveness
arahy.Tifrunner.gnm2.ann1.PX38R1.1	468	474	part of a conserved DNA module involved in light responsiveness
arahy.Tifrunner.gnm2.ann1.PX38R1.1	307	313	part of a conserved DNA module involved in light responsiveness
arahy.Tifrunner.gnm2.ann1.PX38R1.1	291	300	cis-acting regulatory element involved in circadian control
arahy.Tifrunner.gnm2.ann1.PX38R1.1	254	260	cis-acting element involved in low-temperature responsiveness
arahy.Tifrunner.gnm2.ann1.PX38R1.1	112	118	light responsive element
arahy.Tifrunner.gnm2.ann1.QLA9Z7.1	1879	1885	part of a conserved DNA module involved in light responsiveness
arahy.Tifrunner.gnm2.ann1.QLA9Z7.1	1875	1881	part of a conserved DNA module involved in light responsiveness
arahy.Tifrunner.gnm2.ann1.QLA9Z7.1	1726	1735	cis-acting regulatory element involved in circadian control
arahy.Tifrunner.gnm2.ann1.QLA9Z7.1	1634	1640	light responsive element
arahy.Tifrunner.gnm2.ann1.QLA9Z7.1	1562	1568	part of a conserved DNA module involved in light responsiveness
arahy.Tifrunner.gnm2.ann1.QLA9Z7.1	1530	1535	cis-acting element involved in the abscisic acid responsiveness
arahy.Tifrunner.gnm2.ann1.QLA9Z7.1	1529	1535	cis-acting regulatory element involved in light responsiveness
arahy.Tifrunner.gnm2.ann1.QLA9Z7.1	1529	1535	cis-acting regulatory element involved in light responsiveness
arahy.Tifrunner.gnm2.ann1.QLA9Z7.1	1529	1535	cis-acting element involved in the abscisic acid responsiveness
arahy.Tifrunner.gnm2.ann1.QLA9Z7.1	1527	1536	cis-acting element involved in the abscisic acid responsiveness
arahy.Tifrunner.gnm2.ann1.QLA9Z7.1	1496	1501	cis-acting element involved in the abscisic acid responsiveness
arahy.Tifrunner.gnm2.ann1.QLA9Z7.1	1495	1501	cis-acting regulatory element involved in light responsiveness
arahy.Tifrunner.gnm2.ann1.QLA9Z7.1	1343	1349	part of a conserved DNA module involved in light responsiveness
arahy.Tifrunner.gnm2.ann1.QLA9Z7.1	1306	1312	part of a conserved DNA module involved in light responsiveness
arahy.Tifrunner.gnm2.ann1.QLA9Z7.1	1302	1308	part of a conserved DNA module involved in light responsiveness
arahy.Tifrunner.gnm2.ann1.QLA9Z7.1	1031	1038	cis-regulatory element involved in endosperm expression
arahy.Tifrunner.gnm2.ann1.QLA9Z7.1	976	982	MYB binding site involved in drought-inducibility
arahy.Tifrunner.gnm2.ann1.QLA9Z7.1	919	925	cis-acting regulatory element involved in light responsiveness
arahy.Tifrunner.gnm2.ann1.QLA9Z7.1	919	924	cis-acting element involved in the abscisic acid responsiveness
arahy.Tifrunner.gnm2.ann1.QLA9Z7.1	818	825	cis-acting element involved in gibberellin-responsiveness
arahy.Tifrunner.gnm2.ann1.QLA9Z7.1	655	664	cis-acting element involved in defense and stress responsiveness
arahy.Tifrunner.gnm2.ann1.QLA9Z7.1	442	448	cis-acting regulatory element related to meristem expression
arahy.Tifrunner.gnm2.ann1.QLA9Z7.1	315	321	MYB binding site involved in drought-inducibility
arahy.Tifrunner.gnm2.ann1.RF89RI.1	1757	1764	cis-acting regulatory element involved in auxin responsiveness
arahy.Tifrunner.gnm2.ann1.RF89RI.1	1596	1606	light responsive element
arahy.Tifrunner.gnm2.ann1.RF89RI.1	1011	1018	cis-acting element involved in gibberellin-responsiveness
arahy.Tifrunner.gnm2.ann1.RF89RI.1	956	962	part of a conserved DNA module involved in light responsiveness
arahy.Tifrunner.gnm2.ann1.RF89RI.1	924	930	part of a conserved DNA module involved in light responsiveness
arahy.Tifrunner.gnm2.ann1.RF89RI.1	618	629	cis-acting element involved in salicylic acid responsiveness
arahy.Tifrunner.gnm2.ann1.RF89RI.1	533	544	cis-acting element involved in salicylic acid responsiveness
arahy.Tifrunner.gnm2.ann1.RF89RI.1	530	539	cis-acting element involved in salicylic acid responsiveness
arahy.Tifrunner.gnm2.ann1.RF89RI.1	200	209	cis-acting element involved in salicylic acid responsiveness
arahy.Tifrunner.gnm2.ann1.RF89RI.1	1057	1063	auxin-responsive element
arahy.Tifrunner.gnm2.ann1.RM9G1V.1	1823	1832	cis-acting element involved in salicylic acid responsiveness
arahy.Tifrunner.gnm2.ann1.RM9G1V.1	1692	1698	part of a conserved DNA module involved in light responsiveness
arahy.Tifrunner.gnm2.ann1.RM9G1V.1	1663	1669	part of a conserved DNA module involved in light responsiveness
arahy.Tifrunner.gnm2.ann1.RM9G1V.1	1626	1632	part of a conserved DNA module involved in light responsiveness
arahy.Tifrunner.gnm2.ann1.RM9G1V.1	1581	1587	part of a conserved DNA module involved in light responsiveness
arahy.Tifrunner.gnm2.ann1.RM9G1V.1	1562	1568	part of a conserved DNA module involved in light responsiveness
arahy.Tifrunner.gnm2.ann1.RM9G1V.1	1558	1564	part of a conserved DNA module involved in light responsiveness
arahy.Tifrunner.gnm2.ann1.RM9G1V.1	1392	1397	cis-acting regulatory element involved in the MeJA-responsiveness
arahy.Tifrunner.gnm2.ann1.RM9G1V.1	1392	1397	cis-acting regulatory element involved in the MeJA-responsiveness
arahy.Tifrunner.gnm2.ann1.RM9G1V.1	1382	1388	part of a conserved DNA module involved in light responsiveness
arahy.Tifrunner.gnm2.ann1.RM9G1V.1	1287	1293	cis-acting element involved in low-temperature responsiveness
arahy.Tifrunner.gnm2.ann1.RM9G1V.1	1254	1260	part of a conserved DNA module involved in light responsiveness
arahy.Tifrunner.gnm2.ann1.RM9G1V.1	1189	1195	part of a conserved DNA module involved in light responsiveness
arahy.Tifrunner.gnm2.ann1.RM9G1V.1	1092	1098	part of a conserved DNA module involved in light responsiveness
arahy.Tifrunner.gnm2.ann1.RM9G1V.1	879	888	cis-acting regulatory element involved in circadian control
arahy.Tifrunner.gnm2.ann1.RM9G1V.1	839	846	cis-acting element involved in gibberellin-responsiveness
arahy.Tifrunner.gnm2.ann1.RM9G1V.1	802	807	cis-acting regulatory element involved in the MeJA-responsiveness
arahy.Tifrunner.gnm2.ann1.RM9G1V.1	802	807	cis-acting regulatory element involved in the MeJA-responsiveness
arahy.Tifrunner.gnm2.ann1.RM9G1V.1	757	763	light responsive element
arahy.Tifrunner.gnm2.ann1.RM9G1V.1	502	508	part of a conserved DNA module involved in light responsiveness
arahy.Tifrunner.gnm2.ann1.RM9G1V.1	259	265	part of a conserved DNA module involved in light responsiveness
arahy.Tifrunner.gnm2.ann1.RM9G1V.1	230	238	cis-acting regulatory element involved in seed-specific regulation
arahy.Tifrunner.gnm2.ann1.RM9G1V.1	44	50	MYB binding site involved in drought-inducibility
arahy.Tifrunner.gnm2.ann1.RM9G1V.1	1917	1923	auxin-responsive element
arahy.Tifrunner.gnm2.ann1.RM9G1V.1	926	932	auxin-responsive element
arahy.Tifrunner.gnm2.ann1.RMUP98.1	1856	1862	light responsive element
arahy.Tifrunner.gnm2.ann1.RMUP98.1	1775	1781	cis-acting regulatory element related to meristem expression
arahy.Tifrunner.gnm2.ann1.RMUP98.1	1404	1410	part of a conserved DNA module involved in light responsiveness
arahy.Tifrunner.gnm2.ann1.RMUP98.1	1185	1192	gibberellin-responsive element
arahy.Tifrunner.gnm2.ann1.RMUP98.1	1144	1150	MYBHv1 binding site
arahy.Tifrunner.gnm2.ann1.RMUP98.1	1126	1132	light responsive element
arahy.Tifrunner.gnm2.ann1.RMUP98.1	649	654	cis-acting regulatory element involved in the MeJA-responsiveness
arahy.Tifrunner.gnm2.ann1.RMUP98.1	649	654	cis-acting regulatory element involved in the MeJA-responsiveness
arahy.Tifrunner.gnm2.ann1.RMUP98.1	540	546	part of a conserved DNA module involved in light responsiveness
arahy.Tifrunner.gnm2.ann1.RMUP98.1	531	538	cis-acting element involved in gibberellin-responsiveness
arahy.Tifrunner.gnm2.ann1.RMUP98.1	354	360	part of a conserved DNA module involved in light responsiveness
arahy.Tifrunner.gnm2.ann1.RMUP98.1	179	185	part of a conserved DNA module involved in light responsiveness
arahy.Tifrunner.gnm2.ann1.RMUP98.1	40	48	part of a conserved DNA module involved in light responsiveness
arahy.Tifrunner.gnm2.ann1.RUJ0QA.1	1858	1864	part of a conserved DNA module involved in light responsiveness
arahy.Tifrunner.gnm2.ann1.RUJ0QA.1	1719	1725	light responsive element
arahy.Tifrunner.gnm2.ann1.RUJ0QA.1	1704	1709	cis-acting regulatory element involved in the MeJA-responsiveness
arahy.Tifrunner.gnm2.ann1.RUJ0QA.1	1704	1709	cis-acting regulatory element involved in the MeJA-responsiveness
arahy.Tifrunner.gnm2.ann1.RUJ0QA.1	1698	1703	cis-acting regulatory element involved in the MeJA-responsiveness
arahy.Tifrunner.gnm2.ann1.RUJ0QA.1	1698	1703	cis-acting regulatory element involved in the MeJA-responsiveness
arahy.Tifrunner.gnm2.ann1.RUJ0QA.1	1612	1618	part of a conserved DNA module involved in light responsiveness
arahy.Tifrunner.gnm2.ann1.RUJ0QA.1	1606	1612	light responsive element
arahy.Tifrunner.gnm2.ann1.RUJ0QA.1	1605	1612	light responsive element
arahy.Tifrunner.gnm2.ann1.RUJ0QA.1	1555	1560	cis-acting element involved in the abscisic acid responsiveness
arahy.Tifrunner.gnm2.ann1.RUJ0QA.1	1555	1561	cis-acting regulatory element involved in light responsiveness
arahy.Tifrunner.gnm2.ann1.RUJ0QA.1	1421	1427	light responsive element
arahy.Tifrunner.gnm2.ann1.RUJ0QA.1	1186	1195	cis-acting element involved in salicylic acid responsiveness
arahy.Tifrunner.gnm2.ann1.RUJ0QA.1	1061	1067	part of a conserved DNA module involved in light responsiveness
arahy.Tifrunner.gnm2.ann1.RUJ0QA.1	977	984	cis-regulatory element involved in endosperm expression
arahy.Tifrunner.gnm2.ann1.RUJ0QA.1	929	935	part of a conserved DNA module involved in light responsiveness
arahy.Tifrunner.gnm2.ann1.RUJ0QA.1	731	737	cis-acting element involved in low-temperature responsiveness
arahy.Tifrunner.gnm2.ann1.RUJ0QA.1	349	356	cis-regulatory element involved in endosperm expression
arahy.Tifrunner.gnm2.ann1.RUJ0QA.1	43	52	cis-acting element involved in the abscisic acid responsiveness
arahy.Tifrunner.gnm2.ann1.RUJ0QA.1	564	570	auxin-responsive element
arahy.Tifrunner.gnm2.ann1.SY561U.1	1776	1783	gibberellin-responsive element
arahy.Tifrunner.gnm2.ann1.SY561U.1	1725	1731	part of a conserved DNA module involved in light responsiveness
arahy.Tifrunner.gnm2.ann1.SY561U.1	1545	1551	part of a conserved DNA module involved in light responsiveness
arahy.Tifrunner.gnm2.ann1.SY561U.1	1518	1525	MYB binding site involved in light responsiveness
arahy.Tifrunner.gnm2.ann1.SY561U.1	1516	1522	light responsive element
arahy.Tifrunner.gnm2.ann1.SY561U.1	1375	1381	part of a conserved DNA module involved in light responsiveness
arahy.Tifrunner.gnm2.ann1.SY561U.1	1271	1277	part of a conserved DNA module involved in light responsiveness
arahy.Tifrunner.gnm2.ann1.SY561U.1	1178	1183	cis-acting regulatory element involved in the MeJA-responsiveness
arahy.Tifrunner.gnm2.ann1.SY561U.1	1178	1183	cis-acting regulatory element involved in the MeJA-responsiveness
arahy.Tifrunner.gnm2.ann1.SY561U.1	1049	1056	light responsive element
arahy.Tifrunner.gnm2.ann1.SY561U.1	178	185	cis-regulatory element involved in endosperm expression
arahy.Tifrunner.gnm2.ann1.TJLQ2T.1	1908	1913	cis-acting regulatory element involved in the MeJA-responsiveness
arahy.Tifrunner.gnm2.ann1.TJLQ2T.1	1908	1913	cis-acting regulatory element involved in the MeJA-responsiveness
arahy.Tifrunner.gnm2.ann1.TJLQ2T.1	1717	1723	part of a conserved DNA module involved in light responsiveness
arahy.Tifrunner.gnm2.ann1.TJLQ2T.1	1674	1680	part of a conserved DNA module involved in light responsiveness
arahy.Tifrunner.gnm2.ann1.TJLQ2T.1	1473	1479	part of a conserved DNA module involved in light responsiveness
arahy.Tifrunner.gnm2.ann1.TJLQ2T.1	1373	1379	part of a conserved DNA module involved in light responsiveness
arahy.Tifrunner.gnm2.ann1.TJLQ2T.1	1168	1173	cis-acting regulatory element involved in the MeJA-responsiveness
arahy.Tifrunner.gnm2.ann1.TJLQ2T.1	1168	1173	cis-acting regulatory element involved in the MeJA-responsiveness
arahy.Tifrunner.gnm2.ann1.TJLQ2T.1	1075	1082	light responsive element
arahy.Tifrunner.gnm2.ann1.TJLQ2T.1	1054	1059	cis-acting regulatory element involved in the MeJA-responsiveness
arahy.Tifrunner.gnm2.ann1.TJLQ2T.1	1054	1059	cis-acting regulatory element involved in the MeJA-responsiveness
arahy.Tifrunner.gnm2.ann1.TJLQ2T.1	1052	1057	cis-acting element involved in the abscisic acid responsiveness
arahy.Tifrunner.gnm2.ann1.TJLQ2T.1	1052	1058	cis-acting regulatory element involved in light responsiveness
arahy.Tifrunner.gnm2.ann1.TJLQ2T.1	845	850	cis-acting regulatory element involved in the MeJA-responsiveness
arahy.Tifrunner.gnm2.ann1.TJLQ2T.1	845	850	cis-acting regulatory element involved in the MeJA-responsiveness
arahy.Tifrunner.gnm2.ann1.TJLQ2T.1	700	705	cis-acting element involved in the abscisic acid responsiveness
arahy.Tifrunner.gnm2.ann1.TJLQ2T.1	699	705	cis-acting regulatory element involved in light responsiveness
arahy.Tifrunner.gnm2.ann1.TJLQ2T.1	561	571	light responsive element
arahy.Tifrunner.gnm2.ann1.TJLQ2T.1	242	249	cis-regulatory element involved in endosperm expression
arahy.Tifrunner.gnm2.ann1.V4B8PK.1	1870	1876	cis-acting regulatory element related to meristem expression
arahy.Tifrunner.gnm2.ann1.V4B8PK.1	1672	1678	part of a conserved DNA module involved in light responsiveness
arahy.Tifrunner.gnm2.ann1.V4B8PK.1	1668	1674	part of a conserved DNA module involved in light responsiveness
arahy.Tifrunner.gnm2.ann1.V4B8PK.1	1404	1413	cis-acting element involved in salicylic acid responsiveness
arahy.Tifrunner.gnm2.ann1.V4B8PK.1	1309	1315	part of a conserved DNA module involved in light responsiveness
arahy.Tifrunner.gnm2.ann1.V4B8PK.1	1288	1294	part of a conserved DNA module involved in light responsiveness
arahy.Tifrunner.gnm2.ann1.V4B8PK.1	1254	1260	part of a conserved DNA module involved in light responsiveness
arahy.Tifrunner.gnm2.ann1.V4B8PK.1	934	940	MYB binding site involved in drought-inducibility
arahy.Tifrunner.gnm2.ann1.V4B8PK.1	918	924	part of a conserved DNA module involved in light responsiveness
arahy.Tifrunner.gnm2.ann1.V4B8PK.1	731	737	light responsive element
arahy.Tifrunner.gnm2.ann1.V4B8PK.1	658	667	cis-acting element involved in defense and stress responsiveness
arahy.Tifrunner.gnm2.ann1.V4B8PK.1	595	605	cis-acting element involved in defense and stress responsiveness
arahy.Tifrunner.gnm2.ann1.V4B8PK.1	292	298	part of a conserved DNA module involved in light responsiveness
arahy.Tifrunner.gnm2.ann1.V4B8PK.1	112	118	part of a conserved DNA module involved in light responsiveness
arahy.Tifrunner.gnm2.ann1.V4B8PK.1	47	54	cis-acting regulatory element involved in auxin responsiveness
arahy.Tifrunner.gnm2.ann1.V4B8PK.1	1849	1855	auxin-responsive element
arahy.Tifrunner.gnm2.ann1.V89RV5.1	1499	1505	part of a conserved DNA module involved in light responsiveness
arahy.Tifrunner.gnm2.ann1.V89RV5.1	1415	1422	cis-regulatory element involved in endosperm expression
arahy.Tifrunner.gnm2.ann1.V89RV5.1	1405	1411	part of a conserved DNA module involved in light responsiveness
arahy.Tifrunner.gnm2.ann1.V89RV5.1	1367	1373	part of a conserved DNA module involved in light responsiveness
arahy.Tifrunner.gnm2.ann1.V89RV5.1	1335	1342	MYB binding site involved in light responsiveness
arahy.Tifrunner.gnm2.ann1.V89RV5.1	1219	1225	light responsive element
arahy.Tifrunner.gnm2.ann1.V89RV5.1	1218	1225	light responsive element
arahy.Tifrunner.gnm2.ann1.V89RV5.1	1107	1113	part of a conserved DNA module involved in light responsiveness
arahy.Tifrunner.gnm2.ann1.V89RV5.1	830	836	cis-acting element involved in low-temperature responsiveness
arahy.Tifrunner.gnm2.ann1.V89RV5.1	690	696	MYB binding site involved in drought-inducibility
arahy.Tifrunner.gnm2.ann1.V89RV5.1	452	459	cis-regulatory element involved in endosperm expression
arahy.Tifrunner.gnm2.ann1.V89RV5.1	148	157	cis-acting element involved in the abscisic acid responsiveness
arahy.Tifrunner.gnm2.ann1.VES4LD.1	1876	1882	cis-acting regulatory element related to meristem expression
arahy.Tifrunner.gnm2.ann1.VES4LD.1	1677	1683	part of a conserved DNA module involved in light responsiveness
arahy.Tifrunner.gnm2.ann1.VES4LD.1	1673	1679	part of a conserved DNA module involved in light responsiveness
arahy.Tifrunner.gnm2.ann1.VES4LD.1	1554	1563	cis-acting element involved in salicylic acid responsiveness
arahy.Tifrunner.gnm2.ann1.VES4LD.1	1480	1486	part of a conserved DNA module involved in light responsiveness
arahy.Tifrunner.gnm2.ann1.VES4LD.1	1425	1431	part of a conserved DNA module involved in light responsiveness
arahy.Tifrunner.gnm2.ann1.VES4LD.1	1154	1160	cis-acting element involved in low-temperature responsiveness
arahy.Tifrunner.gnm2.ann1.VES4LD.1	1050	1056	part of a conserved DNA module involved in light responsiveness
arahy.Tifrunner.gnm2.ann1.VES4LD.1	948	954	part of a conserved DNA module involved in light responsiveness
arahy.Tifrunner.gnm2.ann1.VES4LD.1	944	950	part of a conserved DNA module involved in light responsiveness
arahy.Tifrunner.gnm2.ann1.VES4LD.1	934	940	part of a conserved DNA module involved in light responsiveness
arahy.Tifrunner.gnm2.ann1.VES4LD.1	743	748	cis-acting regulatory element involved in the MeJA-responsiveness
arahy.Tifrunner.gnm2.ann1.VES4LD.1	743	748	cis-acting regulatory element involved in the MeJA-responsiveness
arahy.Tifrunner.gnm2.ann1.VES4LD.1	685	691	light responsive element
arahy.Tifrunner.gnm2.ann1.VES4LD.1	612	621	cis-acting element involved in defense and stress responsiveness
arahy.Tifrunner.gnm2.ann1.VES4LD.1	343	349	cis-acting element involved in low-temperature responsiveness
arahy.Tifrunner.gnm2.ann1.VES4LD.1	305	311	part of a conserved DNA module involved in light responsiveness
arahy.Tifrunner.gnm2.ann1.VES4LD.1	59	66	cis-acting regulatory element involved in auxin responsiveness
arahy.Tifrunner.gnm2.ann1.VJ6NUA.1	1966	1972	part of a conserved DNA module involved in light responsiveness
arahy.Tifrunner.gnm2.ann1.VJ6NUA.1	1605	1612	cis-regulatory element involved in endosperm expression
arahy.Tifrunner.gnm2.ann1.VJ6NUA.1	1509	1515	cis-acting regulatory element involved in light responsiveness
arahy.Tifrunner.gnm2.ann1.VJ6NUA.1	1358	1364	cis-acting regulatory element involved in light responsiveness
arahy.Tifrunner.gnm2.ann1.VJ6NUA.1	1358	1363	cis-acting element involved in the abscisic acid responsiveness
arahy.Tifrunner.gnm2.ann1.VJ6NUA.1	1149	1158	part of a conserved DNA module involved in light responsiveness
arahy.Tifrunner.gnm2.ann1.VJ6NUA.1	1015	1021	part of a conserved DNA module involved in light responsiveness
arahy.Tifrunner.gnm2.ann1.VJ6NUA.1	547	553	cis-acting element involved in low-temperature responsiveness
arahy.Tifrunner.gnm2.ann1.VJ6NUA.1	349	355	part of a conserved DNA module involved in light responsiveness
arahy.Tifrunner.gnm2.ann1.VJ6NUA.1	118	124	part of a conserved DNA module involved in light responsiveness
arahy.Tifrunner.gnm2.ann1.VJ6NUA.1	1375	1381	auxin-responsive element
arahy.Tifrunner.gnm2.ann1.VLT6V3.1	1967	1974	gibberellin-responsive element
arahy.Tifrunner.gnm2.ann1.VLT6V3.1	1763	1768	cis-acting element involved in the abscisic acid responsiveness
arahy.Tifrunner.gnm2.ann1.VLT6V3.1	1762	1768	cis-acting regulatory element involved in light responsiveness
arahy.Tifrunner.gnm2.ann1.VLT6V3.1	1680	1685	cis-acting element involved in the abscisic acid responsiveness
arahy.Tifrunner.gnm2.ann1.VLT6V3.1	1679	1685	cis-acting regulatory element involved in light responsiveness
arahy.Tifrunner.gnm2.ann1.VLT6V3.1	1679	1685	cis-acting element involved in the abscisic acid responsiveness
arahy.Tifrunner.gnm2.ann1.VLT6V3.1	1679	1685	cis-acting regulatory element involved in light responsiveness
arahy.Tifrunner.gnm2.ann1.VLT6V3.1	1559	1568	cis-acting element involved in the abscisic acid responsiveness
arahy.Tifrunner.gnm2.ann1.VLT6V3.1	1485	1491	cis-acting regulatory element related to meristem expression
arahy.Tifrunner.gnm2.ann1.VLT6V3.1	1285	1294	light responsive element
arahy.Tifrunner.gnm2.ann1.VLT6V3.1	1266	1271	cis-acting regulatory element involved in the MeJA-responsiveness
arahy.Tifrunner.gnm2.ann1.VLT6V3.1	1266	1271	cis-acting regulatory element involved in the MeJA-responsiveness
arahy.Tifrunner.gnm2.ann1.VLT6V3.1	1243	1250	light responsive element
arahy.Tifrunner.gnm2.ann1.VLT6V3.1	1143	1149	cis-acting element involved in low-temperature responsiveness
arahy.Tifrunner.gnm2.ann1.VLT6V3.1	774	780	part of a conserved DNA module involved in light responsiveness
arahy.Tifrunner.gnm2.ann1.VLT6V3.1	770	776	part of a conserved DNA module involved in light responsiveness
arahy.Tifrunner.gnm2.ann1.VLT6V3.1	646	652	light responsive element
arahy.Tifrunner.gnm2.ann1.VLT6V3.1	303	309	light responsive element
arahy.Tifrunner.gnm2.ann1.VLT6V3.1	284	289	cis-acting element involved in the abscisic acid responsiveness
arahy.Tifrunner.gnm2.ann1.VLT6V3.1	283	289	cis-acting regulatory element involved in light responsiveness
arahy.Tifrunner.gnm2.ann1.VLT6V3.1	283	289	cis-acting element involved in the abscisic acid responsiveness
arahy.Tifrunner.gnm2.ann1.VLT6V3.1	283	289	cis-acting regulatory element involved in light responsiveness
arahy.Tifrunner.gnm2.ann1.VLT6V3.1	265	271	cis-acting element involved in low-temperature responsiveness
arahy.Tifrunner.gnm2.ann1.VLT6V3.1	259	265	part of a conserved DNA module involved in light responsiveness
arahy.Tifrunner.gnm2.ann1.VLT6V3.1	236	243	cis-acting regulatory element involved in auxin responsiveness
arahy.Tifrunner.gnm2.ann1.XBXR9Z.1	1814	1824.5	MYB binding site involved in flavonoid biosynthetic genes regulation
arahy.Tifrunner.gnm2.ann1.XBXR9Z.1	1735	1742	gibberellin-responsive element
arahy.Tifrunner.gnm2.ann1.XBXR9Z.1	1468	1473	cis-acting regulatory element involved in the MeJA-responsiveness
arahy.Tifrunner.gnm2.ann1.XBXR9Z.1	1468	1473	cis-acting regulatory element involved in the MeJA-responsiveness
arahy.Tifrunner.gnm2.ann1.XBXR9Z.1	1219	1228	cis-acting regulatory element involved in circadian control
arahy.Tifrunner.gnm2.ann1.XBXR9Z.1	1074	1081	MYB binding site involved in light responsiveness
arahy.Tifrunner.gnm2.ann1.XBXR9Z.1	842	848	cis-acting element involved in low-temperature responsiveness
arahy.Tifrunner.gnm2.ann1.XBXR9Z.1	677	683	cis-acting regulatory element involved in light responsiveness
arahy.Tifrunner.gnm2.ann1.XBXR9Z.1	677	682	cis-acting element involved in the abscisic acid responsiveness
arahy.Tifrunner.gnm2.ann1.XBXR9Z.1	180	185	cis-acting regulatory element involved in the MeJA-responsiveness
arahy.Tifrunner.gnm2.ann1.XBXR9Z.1	180	185	cis-acting regulatory element involved in the MeJA-responsiveness
arahy.Tifrunner.gnm2.ann1.XBXR9Z.1	143	149	part of a conserved DNA module involved in light responsiveness
arahy.Tifrunner.gnm2.ann1.XBXR9Z.1	314	320	auxin-responsive element
arahy.Tifrunner.gnm2.ann1.XG1GJV.1	1570	1576	part of a conserved DNA module involved in light responsiveness
arahy.Tifrunner.gnm2.ann1.XG1GJV.1	1111	1118	cis-acting element involved in gibberellin-responsiveness
arahy.Tifrunner.gnm2.ann1.XG1GJV.1	984	990	cis-acting element involved in low-temperature responsiveness
arahy.Tifrunner.gnm2.ann1.XG1GJV.1	934	940	MYB binding site involved in drought-inducibility
arahy.Tifrunner.gnm2.ann1.XG1GJV.1	783	791	cis-acting regulatory element involved in seed-specific regulation
arahy.Tifrunner.gnm2.ann1.XG1GJV.1	586	592	light responsive element
arahy.Tifrunner.gnm2.ann1.XG1GJV.1	585	592	light responsive element
arahy.Tifrunner.gnm2.ann1.XG1GJV.1	556	565	cis-acting element involved in the abscisic acid responsiveness
arahy.Tifrunner.gnm2.ann1.XG1GJV.1	526	533	gibberellin-responsive element
arahy.Tifrunner.gnm2.ann1.XG1GJV.1	483	492	cis-acting element involved in salicylic acid responsiveness
arahy.Tifrunner.gnm2.ann1.YB2114.1	1799	1805	part of a conserved DNA module involved in light responsiveness
arahy.Tifrunner.gnm2.ann1.YB2114.1	1684	1692	cis-acting regulatory element involved in seed-specific regulation
arahy.Tifrunner.gnm2.ann1.YB2114.1	1669	1675	cis-acting regulatory element related to meristem expression
arahy.Tifrunner.gnm2.ann1.YB2114.1	1357	1362	cis-acting element involved in the abscisic acid responsiveness
arahy.Tifrunner.gnm2.ann1.YB2114.1	1356	1362	cis-acting regulatory element involved in light responsiveness
arahy.Tifrunner.gnm2.ann1.YB2114.1	1136	1143	gibberellin-responsive element
arahy.Tifrunner.gnm2.ann1.YB2114.1	961	970	cis-acting element involved in defense and stress responsiveness
arahy.Tifrunner.gnm2.ann1.YB2114.1	913	918	cis-acting element involved in the abscisic acid responsiveness
arahy.Tifrunner.gnm2.ann1.YB2114.1	912	918	cis-acting regulatory element involved in light responsiveness
arahy.Tifrunner.gnm2.ann1.YB2114.1	848	854	cis-acting regulatory element involved in light responsiveness
arahy.Tifrunner.gnm2.ann1.YB2114.1	848	853	cis-acting element involved in the abscisic acid responsiveness
arahy.Tifrunner.gnm2.ann1.YB2114.1	524	531	cis-acting regulatory element involved in auxin responsiveness
arahy.Tifrunner.gnm2.ann1.YB2114.1	380	387	cis-acting element involved in the abscisic acid responsiveness
arahy.Tifrunner.gnm2.ann1.YB2114.1	223	228	cis-acting regulatory element involved in the MeJA-responsiveness
arahy.Tifrunner.gnm2.ann1.YB2114.1	223	228	cis-acting regulatory element involved in the MeJA-responsiveness
arahy.Tifrunner.gnm2.ann1.YB2114.1	72	78	part of a conserved DNA module involved in light responsiveness
arahy.Tifrunner.gnm2.ann1.YB2114.1	1302	1308	auxin-responsive element

## Sheet: Table S7
Table S7:Results of the KEGG enrichment analysis.
KEGG_A_class	KEGG_B_class	Pathway	out (16)	All (24350)	Pvalue	Qvalue	Pathway ID	Genes
Metabolism	Glycan biosynthesis and metabolism	Glycosylphosphatidylinositol(GPI)-anchor biosynthesis	15	140	1.82283e-33	7.29132e-33	ko00563	arahy.Tifrunner.gnm2.ann1.6SHE48;arahy.Tifrunner.gnm2.ann1.7Y3SM7;arahy.Tifrunner.gnm2.ann1.AVE3D2;arahy.Tifrunner.gnm2.ann1.F1TUFL;arahy.Tifrunner.gnm2.ann1.FJ610L;arahy.Tifrunner.gnm2.ann1.JGC745;arahy.Tifrunner.gnm2.ann1.K28R5D;arahy.Tifrunner.gnm2.ann1.PW1K78;arahy.Tifrunner.gnm2.ann1.SY561U;arahy.Tifrunner.gnm2.ann1.TJLQ2T;arahy.Tifrunner.gnm2.ann1.V4B8PK;arahy.Tifrunner.gnm2.ann1.VES4LD;ara…
Metabolism	Global and overview maps	Metabolic pathways	16	10947	2.76768e-06	5.53536e-06	ko01100	arahy.Tifrunner.gnm2.ann1.6SHE48;arahy.Tifrunner.gnm2.ann1.7Y3SM7;arahy.Tifrunner.gnm2.ann1.AVE3D2;arahy.Tifrunner.gnm2.ann1.F1TUFL;arahy.Tifrunner.gnm2.ann1.FJ610L;arahy.Tifrunner.gnm2.ann1.JGC745;arahy.Tifrunner.gnm2.ann1.K28R5D;arahy.Tifrunner.gnm2.ann1.PW1K78;arahy.Tifrunner.gnm2.ann1.SY561U;arahy.Tifrunner.gnm2.ann1.TJLQ2T;arahy.Tifrunner.gnm2.ann1.V4B8PK;arahy.Tifrunner.gnm2.ann1.V89RV5;ara…
